# Supplementary material
Source: PubMed Central journal article supplement (PMC7011744)
Supplement: cg9b00889_si_001.pdf [file cg9b00889_si_001.pdf]

# **Supplementary material to: Simulation of Calcium Phosphate Pre-Nucleation Clusters in Aqueous Solution: Association beyond ion pairing**

Natalya A. Garcia<sup>1</sup>, Riccardo Innocenti Malini<sup>2,3</sup>, Colin L. Freeman<sup>2</sup>, Raffaella Demichelis<sup>1</sup>, Paolo Raiteri<sup>1,\*</sup>, Nico A.J.M Sommerdijk<sup>4</sup>, John H. Harding<sup>2</sup> and Julian D. Gale<sup>1</sup>

<sup>1</sup> Curtin Institute for Computation, The Institute for Geoscience Research (TIGeR), and School of Molecular and Life Sciences, Curtin University, PO Box U1987, Perth, WA 6845, Australia.

<sup>2</sup> Department of Materials Science and Engineering, University of Sheffield, Sheffield, S1 3JD, United Kingdom.

<sup>3</sup> Empa, Swiss Federal Laboratories for Materials Science and Technology, Laboratory for Protection and Physiology, St. Gallen, Switzerland.

<sup>4</sup> Department of Chemical Engineering and Chemistry, Technische Universiteit Eindhoven, PO Box 513, Eindhoven, Netherlands.

[\\*p.raiteri@curtin.edu.au](mailto:p.raiteri@curtin.edu.au)

|                                                               |           |
|---------------------------------------------------------------|-----------|
| <b>SUPPLEMENTARY METHODS.....</b>                             | <b>2</b>  |
| <b>DETERMINATION OF THE LOWEST FREE ENERGY STRUCTURE.....</b> | <b>2</b>  |
| <b>SUPPLEMENTARY TABLES AND FIGURES .....</b>                 | <b>3</b>  |
| <b>SUPPLEMENTARY DISCUSSION .....</b>                         | <b>29</b> |
| <b>ON THE ALIGNMENT OF FREE ENERGY PROFILES.....</b>          | <b>29</b> |
| <b>REFERENCES.....</b>                                        | <b>29</b> |

## Supplementary Methods

### Determination of the lowest free energy structure

In the cases where an ion association involved only one Ca, the lowest free energy structure was determined as simply the lowest free energy as a function of both the distance and Ca coordination number (CN). For associations involving two Ca, the free energy was determined as a function of three collective variables (CVs). Therefore, the free energy was compared as a function of each CV alone or as a combination of each pair of 2 CVs (where the remaining CV(s) are integrated out). For example, in the case of  $[\text{Ca}(\text{HPO}_4)_2]^{-2+} + \text{Ca}^{+2} \rightarrow [(\text{CaHPO}_4)_2]$ , the three 3-dimensional plots (free energy vs 2 CVs) in Figure S3 corresponding to all combinations of the three CVs yield a consistent picture of the free energy landscape and minimum. The free energy as a function of the ion Ca CN and distance indicates that the minimum is around 3.5 Å with an ion Ca CN of 4. As a function of the cluster Ca CN and distance, it indicates that the minimum is around 3.5 Å with a cluster Ca CN of 4. As a function of the ion Ca CN and cluster Ca CN, it indicates that both CNs should be 4. All of this leads to a structure which should have 4 water oxygens coordinated to each Ca and a Ca-Ca distance of approximately 3.5 Å.

In Figures S1-S20 the free energy profiles are given as a function of 1 and 2 CVs for all of the ion association processes studied. In the case of the 1-D free energy profiles versus distance then a dashed black line is included to indicate the asymptotic long-range limit used to align the free energy and check convergence.



## Supplementary Tables and Figures

**Table S1.** The association reaction performed and the corresponding standard free energy, time simulated, biased CV(s) and walled CV(s) for each process, where “d” refers to distance, “CN” refers to coordination number and “COM” refers to the center of mass of a cluster. In the “Walled CV” column, all distance walls are upper walls, all coordination number walls are lower walls and all subscripts denote which atom the wall occurs between, corresponding to numerical appearance in the association reaction as labeled. The bias factor used was 5 except in the cases of 8, 11, 12, 17 and 18 where the bias factor was 15.

|          | <b>Association</b>                                                                             | <b><math>\Delta G</math><br/>(kJ/mol)</b> | <b>Time<br/>(ns)</b> | <b>Biased<br/>CVs</b>                                                                | <b>Walled CVs<br/>(Å)</b>                                                                                                                                                                                                                                           |
|----------|------------------------------------------------------------------------------------------------|-------------------------------------------|----------------------|--------------------------------------------------------------------------------------|---------------------------------------------------------------------------------------------------------------------------------------------------------------------------------------------------------------------------------------------------------------------|
| <b>1</b> | $\text{Ca}^{2+} + \text{HPO}_4^{2-} \rightarrow \text{CaHPO}_4$                                | -17.86                                    | 150                  | Ca-P d<br>Ca-O <sub>w</sub> CN                                                       | Ca-P d: 16.0                                                                                                                                                                                                                                                        |
| <b>2</b> | $\text{CaHPO}_4 + \text{HPO}_4^{2-} \rightarrow \text{Ca}(\text{HPO}_4)_2$                     | -12.01                                    | 150                  | Ca-P d<br>Ca-O <sub>w</sub> CN                                                       | Ca-P <sub>2</sub> d: 16.0<br>Ca-P <sub>1</sub> CN: 0.9                                                                                                                                                                                                              |
| <b>3</b> | $\text{Ca}(\text{HPO}_4)_2^{2-} + \text{Ca}^{2+} \rightarrow (\text{CaHPO}_4)_2$               | -21.26                                    | 150                  | Ca-Ca d<br>Ca <sub>1</sub> -O <sub>w</sub> CN<br>Ca <sub>2</sub> -O <sub>w</sub> CN  | Ca-Ca d: 16.0<br>Ca(P <sub>1</sub> ,P <sub>2</sub> ) CN: 1.9                                                                                                                                                                                                        |
| <b>4</b> | $\text{CaHPO}_4 + \text{Ca}^{2+} \rightarrow \text{Ca}_2\text{HPO}_4^{2+}$                     | -2.84                                     | 150                  | Ca-Ca d<br>Ca <sub>1</sub> -O <sub>w</sub> CN<br>Ca <sub>2</sub> -O <sub>w</sub> CN  | Ca-Ca d: 16.0<br>Ca <sub>1</sub> (P <sub>1</sub> ) CN: 0.9                                                                                                                                                                                                          |
| <b>5</b> | $\text{Ca}_2\text{HPO}_4^{2+} + \text{HPO}_4^{2-} \rightarrow (\text{CaHPO}_4)_2$              | -33.59                                    | 150                  | COM-P d<br>Ca <sub>1</sub> -O <sub>w</sub> CN<br>Ca <sub>2</sub> -O <sub>w</sub> CN  | COM-P <sub>2</sub> d<br>(Ca <sub>1</sub> ,Ca <sub>2</sub> )P <sub>1</sub> CN: 1.9                                                                                                                                                                                   |
| <b>6</b> | $\text{CaHPO}_4 + \text{CaHPO}_4 \rightarrow (\text{CaHPO}_4)_2$                               | -15.25                                    | 300                  | Ca-Ca d<br>Ca <sub>1</sub> -O <sub>w</sub> CN<br>Ca <sub>2</sub> -O <sub>w</sub> CN  | Ca-Ca d: 16.0<br>Ca <sub>1</sub> (P <sub>1</sub> ,P <sub>2</sub> ) CN: 0.9<br>Ca <sub>2</sub> (P <sub>1</sub> ,P <sub>2</sub> ) CN: 0.9<br>P <sub>1</sub> (Ca <sub>1</sub> ,Ca <sub>2</sub> ) CN: 0.9<br>P <sub>2</sub> (Ca <sub>1</sub> ,Ca <sub>2</sub> ) CN: 0.9 |
| <b>7</b> | $\text{HPO}_4^{2-} + (\text{CaHPO}_4)_2 \rightarrow \text{Ca}_2(\text{HPO}_4)_3^{2-}$          | -16.65                                    | 300                  | COM-Ca d<br>Ca <sub>1</sub> -O <sub>w</sub> CN<br>Ca <sub>2</sub> -O <sub>w</sub> CN | COM-P d: 16.0<br>(Ca <sub>1</sub> ,Ca <sub>2</sub> )(P <sub>2</sub> ,P <sub>3</sub> ): CN:2.9                                                                                                                                                                       |
| <b>8</b> | $\text{CaHPO}_4 + \text{Ca}(\text{HPO}_4)_2^{2-} \rightarrow \text{Ca}_2(\text{HPO}_4)_3^{2-}$ | -19.49                                    | 150                  | Ca-Ca d<br>Ca <sub>1</sub> -O <sub>w</sub> CN<br>Ca <sub>2</sub> -O <sub>w</sub> CN  | Ca-Ca d: 16.0<br>Ca <sub>1</sub> (P <sub>1</sub> ,P <sub>2</sub> ,P <sub>3</sub> ) CN: 0.9<br>Ca <sub>2</sub> (P <sub>1</sub> ,P <sub>2</sub> ,P <sub>3</sub> ) CN: 1.9<br>P <sub>1</sub> (Ca <sub>1</sub> ,Ca <sub>2</sub> ) CN: 0.9                               |

|           |                                                                                                                                                                                 |        |      |                                                                                     |                                                                                                                                                                                                                                                                                                                                                                                                                                                                 |
|-----------|---------------------------------------------------------------------------------------------------------------------------------------------------------------------------------|--------|------|-------------------------------------------------------------------------------------|-----------------------------------------------------------------------------------------------------------------------------------------------------------------------------------------------------------------------------------------------------------------------------------------------------------------------------------------------------------------------------------------------------------------------------------------------------------------|
|           |                                                                                                                                                                                 |        |      |                                                                                     | P <sub>2</sub> (Ca <sub>1</sub> ,Ca <sub>2</sub> ) CN: 0.9<br>P <sub>3</sub> (Ca <sub>1</sub> ,Ca <sub>2</sub> ) CN: 0.9                                                                                                                                                                                                                                                                                                                                        |
| <b>9a</b> | Ca(HPO <sub>4</sub> ) <sub>2</sub> <sup>-2</sup> + HPO <sub>4</sub> <sup>-2</sup><br>→ Ca(HPO <sub>4</sub> ) <sub>3</sub> <sup>-4</sup>                                         | 1.12   | 239  | Ca-P d<br>Ca-O <sub>w</sub> CN                                                      | Ca-P <sub>3</sub> d: 16.0<br>Ca(P <sub>1</sub> ,P <sub>2</sub> ) CN: 1.9                                                                                                                                                                                                                                                                                                                                                                                        |
| <b>9b</b> | Ca <sup>+2</sup> + HPO <sub>4</sub> <sup>-2</sup> +<br>HPO <sub>4</sub> <sup>-2</sup> + HPO <sub>4</sub> <sup>-2</sup> →<br>Ca(HPO <sub>4</sub> ) <sub>3</sub> <sup>-4</sup>    | 1.39   | 727+ | Ca-P <sub>1</sub> d<br>Ca-P <sub>2</sub> d<br>Ca-P <sub>3</sub> d                   | Ca-P <sub>1</sub> d: 16.0<br>Ca-P <sub>2</sub> d: 16.0<br>Ca-P <sub>3</sub> d: 16.0                                                                                                                                                                                                                                                                                                                                                                             |
| <b>10</b> | Ca(HPO <sub>4</sub> ) <sub>3</sub> <sup>-4</sup> + Ca <sup>+2</sup> →<br>Ca <sub>2</sub> (HPO <sub>4</sub> ) <sub>3</sub> <sup>-2</sup>                                         | -39.81 | 300  | Ca-Ca d<br>Ca <sub>1</sub> -O <sub>w</sub> CN<br>Ca <sub>2</sub> -O <sub>w</sub> CN | Ca-Ca d d: 20.0<br>Ca <sub>1</sub> (P <sub>1</sub> ,P <sub>2</sub> ,P <sub>3</sub> ) d: 2.9                                                                                                                                                                                                                                                                                                                                                                     |
| <b>11</b> | Ca(HPO <sub>4</sub> ) <sub>2</sub> <sup>-2</sup> +<br>Ca(HPO <sub>4</sub> ) <sub>2</sub> <sup>-2</sup> →<br>Ca <sub>2</sub> (HPO <sub>4</sub> ) <sub>4</sub> <sup>-4</sup>      | -8.72  | 233  | Ca-Ca d<br>Ca <sub>1</sub> -O <sub>w</sub> CN<br>Ca <sub>2</sub> -O <sub>w</sub> CN | Ca-Ca d: 20.0<br>Ca <sub>1</sub> (P <sub>1</sub> ,P <sub>2</sub> ,P <sub>3</sub> ,P <sub>4</sub> ) CN: 1.9<br>Ca <sub>2</sub> (P <sub>1</sub> ,P <sub>2</sub> ,P <sub>3</sub> ,P <sub>4</sub> ) CN: 1.9<br>P <sub>1</sub> (Ca <sub>1</sub> ,Ca <sub>2</sub> ) CN: 0.9<br>P <sub>2</sub> (Ca <sub>1</sub> ,Ca <sub>2</sub> ) CN: 0.9<br>P <sub>3</sub> (Ca <sub>1</sub> ,Ca <sub>2</sub> ) CN: 0.9<br>P <sub>4</sub> (Ca <sub>1</sub> ,Ca <sub>2</sub> ) CN: 0.9 |
| <b>12</b> | Ca(HPO <sub>4</sub> ) <sub>3</sub> <sup>-4</sup> +<br>CaHPO <sub>4</sub> →<br>Ca <sub>2</sub> (HPO <sub>4</sub> ) <sub>4</sub> <sup>-4</sup>                                    | -27.89 | 450  | Ca-Ca d<br>Ca <sub>1</sub> -O <sub>w</sub> CN<br>Ca <sub>2</sub> -O <sub>w</sub> CN | Ca-Ca d: 20.0<br>Ca <sub>1</sub> (P <sub>1</sub> ,P <sub>2</sub> ,P <sub>3</sub> ,P <sub>4</sub> ) CN: 2.9<br>Ca <sub>2</sub> (P <sub>1</sub> ,P <sub>2</sub> ,P <sub>3</sub> ,P <sub>4</sub> ) CN: 0.9<br>P <sub>1</sub> (Ca <sub>1</sub> ,Ca <sub>2</sub> ) CN: 0.9<br>P <sub>2</sub> (Ca <sub>1</sub> ,Ca <sub>2</sub> ) CN: 0.9<br>P <sub>3</sub> (Ca <sub>1</sub> ,Ca <sub>2</sub> ) CN: 0.9<br>P <sub>4</sub> (Ca <sub>1</sub> ,Ca <sub>2</sub> ) CN: 0.9 |
| <b>13</b> | Ca <sub>2</sub> (HPO <sub>4</sub> ) <sub>3</sub> <sup>-2</sup> + HPO <sub>4</sub> <sup>-</sup><br><sub>2</sub> → Ca <sub>2</sub> (HPO <sub>4</sub> ) <sub>4</sub> <sup>-4</sup> | -0.20  | 300  | COM-P d<br>Ca <sub>1</sub> -O <sub>w</sub> CN<br>Ca <sub>2</sub> -O <sub>w</sub> CN | COM-P <sub>4</sub> d: 20.0<br>(Ca <sub>1</sub> ,Ca <sub>2</sub> )(P <sub>1</sub> ,P <sub>2</sub> ,P <sub>3</sub> ) CN:<br>3.9<br>P <sub>1</sub> (Ca <sub>1</sub> ,Ca <sub>2</sub> ) CN: 0.9<br>P <sub>2</sub> (Ca <sub>1</sub> ,Ca <sub>2</sub> ) CN: 0.9<br>P <sub>3</sub> (Ca <sub>1</sub> ,Ca <sub>2</sub> ) CN: 0.9                                                                                                                                         |
| <b>14</b> | Ca <sub>2</sub> (HPO <sub>4</sub> ) <sub>4</sub> <sup>-4</sup> + HPO <sub>4</sub> <sup>-</sup><br><sub>2</sub> → Ca <sub>2</sub> (HPO <sub>4</sub> ) <sub>5</sub> <sup>-6</sup> | 9.57   | 150  | COM-P d<br>Ca <sub>1</sub> -O <sub>w</sub> CN<br>Ca <sub>2</sub> -O <sub>w</sub> CN | COM-P <sub>5</sub> d: 20.0<br>(Ca <sub>1</sub> ,Ca <sub>2</sub> )(P <sub>1</sub> ,P <sub>2</sub> ,P <sub>3</sub> ,P <sub>4</sub> ) CN:<br>4.9<br>P <sub>1</sub> (Ca <sub>1</sub> ,Ca <sub>2</sub> ) CN: 0.9<br>P <sub>2</sub> (Ca <sub>1</sub> ,Ca <sub>2</sub> ) CN: 0.9<br>P <sub>3</sub> (Ca <sub>1</sub> ,Ca <sub>2</sub> ) CN: 0.9<br>P <sub>4</sub> (Ca <sub>1</sub> ,Ca <sub>2</sub> ) CN: 0.9                                                           |
| <b>15</b> | Ca(HPO <sub>4</sub> ) <sub>3</sub> <sup>-4</sup> +<br>Ca(HPO <sub>4</sub> ) <sub>2</sub> <sup>-2</sup> →<br>Ca <sub>2</sub> (HPO <sub>4</sub> ) <sub>5</sub> <sup>-6</sup>      | -2.65  | 300  | Ca-Ca d<br>Ca <sub>1</sub> -O <sub>w</sub> CN<br>Ca <sub>2</sub> -O <sub>w</sub> CN | Ca-Ca d: 20.0<br>Ca <sub>1</sub> (P <sub>1</sub> ,P <sub>2</sub> ,P <sub>3</sub> ,P <sub>4</sub> ,P <sub>5</sub> ) CN:<br>2.9<br>Ca <sub>2</sub> (P <sub>1</sub> ,P <sub>2</sub> ,P <sub>3</sub> ,P <sub>4</sub> ,P <sub>5</sub> ) CN:<br>1.9<br>P <sub>1</sub> (Ca <sub>1</sub> ,Ca <sub>2</sub> ) CN: 0.9<br>P <sub>2</sub> (Ca <sub>1</sub> ,Ca <sub>2</sub> ) CN: 0.9<br>P <sub>3</sub> (Ca <sub>1</sub> ,Ca <sub>2</sub> ) CN: 0.9                         |

|           |                                                                                                                                                                            |        |     |                                                                                     |                                                                                                                                                                                                                                                                                                                                                                                                                                                                                                                                                                                                                                                                                     |
|-----------|----------------------------------------------------------------------------------------------------------------------------------------------------------------------------|--------|-----|-------------------------------------------------------------------------------------|-------------------------------------------------------------------------------------------------------------------------------------------------------------------------------------------------------------------------------------------------------------------------------------------------------------------------------------------------------------------------------------------------------------------------------------------------------------------------------------------------------------------------------------------------------------------------------------------------------------------------------------------------------------------------------------|
|           |                                                                                                                                                                            |        |     |                                                                                     | P <sub>4</sub> (Ca <sub>1</sub> ,Ca <sub>2</sub> ) CN: 0.9<br>P <sub>5</sub> (Ca <sub>1</sub> ,Ca <sub>2</sub> ) CN: 0.9                                                                                                                                                                                                                                                                                                                                                                                                                                                                                                                                                            |
| <b>16</b> | Ca(HPO <sub>4</sub> ) <sub>3</sub> <sup>-4</sup> + HPO <sub>4</sub> <sup>-2</sup><br>→ Ca(HPO <sub>4</sub> ) <sub>4</sub> <sup>-6</sup>                                    | 10.91  | 300 | Ca-P d<br>Ca-O <sub>w</sub> CN                                                      | Ca-P <sub>4</sub> d: 20.0<br>Ca(P <sub>1</sub> ,P <sub>2</sub> ,P <sub>3</sub> ) CN: 2.9                                                                                                                                                                                                                                                                                                                                                                                                                                                                                                                                                                                            |
| <b>17</b> | Ca(HPO <sub>4</sub> ) <sub>4</sub> <sup>-6</sup> +<br>CaHPO <sub>4</sub> →<br>Ca <sub>2</sub> (HPO <sub>4</sub> ) <sub>5</sub> <sup>-6</sup>                               | -30.99 | 448 | Ca-Ca d<br>Ca <sub>1</sub> -O <sub>w</sub> CN<br>Ca <sub>2</sub> -O <sub>w</sub> CN | Ca-Ca d: 20.0<br>Ca <sub>1</sub> (P <sub>1</sub> ,P <sub>2</sub> ,P <sub>3</sub> ,P <sub>4</sub> ,P <sub>5</sub> ) CN:<br>3.9<br>Ca <sub>2</sub> (P <sub>1</sub> ,P <sub>2</sub> ,P <sub>3</sub> ,P <sub>4</sub> ,P <sub>5</sub> ) CN:<br>0.9<br>P <sub>1</sub> (Ca <sub>1</sub> ,Ca <sub>2</sub> ) CN: 0.9<br>P <sub>2</sub> (Ca <sub>1</sub> ,Ca <sub>2</sub> ) CN: 0.9<br>P <sub>3</sub> (Ca <sub>1</sub> ,Ca <sub>2</sub> ) CN: 0.9<br>P <sub>4</sub> (Ca <sub>1</sub> ,Ca <sub>2</sub> ) CN: 0.9<br>P <sub>5</sub> (Ca <sub>1</sub> ,Ca <sub>2</sub> ) CN: 0.9                                                                                                                 |
| <b>18</b> | Ca <sub>2</sub> (HPO <sub>4</sub> ) <sub>5</sub> <sup>-6</sup> + HPO <sub>4</sub> <sup>-2</sup><br>→ Ca <sub>2</sub> (HPO <sub>4</sub> ) <sub>6</sub> <sup>-8</sup>        | 20.93  | 300 | COM-P d<br>Ca <sub>1</sub> -O <sub>w</sub> CN<br>Ca <sub>2</sub> -O <sub>w</sub> CN | COM-P <sub>6</sub> d: 20.0<br>(Ca <sub>1</sub> ,Ca <sub>2</sub> )(P <sub>1</sub> ,P <sub>2</sub> ,P <sub>3</sub> ,P <sub>4</sub> ,P <sub>5</sub> )<br>CN: 5.9<br>P <sub>1</sub> (Ca <sub>1</sub> ,Ca <sub>2</sub> ) CN: 0.9<br>P <sub>2</sub> (Ca <sub>1</sub> ,Ca <sub>2</sub> ) CN: 0.9<br>P <sub>3</sub> (Ca <sub>1</sub> ,Ca <sub>2</sub> ) CN: 0.9<br>P <sub>4</sub> (Ca <sub>1</sub> ,Ca <sub>2</sub> ) CN: 0.9<br>P <sub>5</sub> (Ca <sub>1</sub> ,Ca <sub>2</sub> ) CN: 0.9                                                                                                                                                                                                 |
| <b>19</b> | Ca(HPO <sub>4</sub> ) <sub>3</sub> <sup>-4</sup> +<br>Ca(HPO <sub>4</sub> ) <sub>3</sub> <sup>-4</sup> →<br>Ca <sub>2</sub> (HPO <sub>4</sub> ) <sub>6</sub> <sup>-8</sup> | 12.19  | 390 | Ca-Ca d<br>Ca <sub>1</sub> -O <sub>w</sub> CN<br>Ca <sub>2</sub> -O <sub>w</sub> CN | Ca-Ca d: 20.0<br>(Ca <sub>1</sub> ,C <sub>2</sub> )(P <sub>1</sub> ,P <sub>2</sub> ,P <sub>3</sub> ,P <sub>4</sub> ,P <sub>5</sub> ,P <sub>6</sub> )<br>CN: 5.9<br>Ca <sub>2</sub> (P <sub>1</sub> ,P <sub>2</sub> ,P <sub>3</sub> ,P <sub>4</sub> ,P <sub>5</sub> ,P <sub>6</sub> ) CN:<br>0.9<br>P <sub>1</sub> (Ca <sub>1</sub> ,Ca <sub>2</sub> ) CN: 0.9<br>P <sub>2</sub> (Ca <sub>1</sub> ,Ca <sub>2</sub> ) CN: 0.9<br>P <sub>3</sub> (Ca <sub>1</sub> ,Ca <sub>2</sub> ) CN: 0.9<br>P <sub>4</sub> (Ca <sub>1</sub> ,Ca <sub>2</sub> ) CN: 0.9<br>P <sub>5</sub> (Ca <sub>1</sub> ,Ca <sub>2</sub> ) CN: 0.9<br>P <sub>6</sub> (Ca <sub>1</sub> ,Ca <sub>2</sub> ) CN: 0.9 |
| <b>20</b> | Ca(HPO <sub>4</sub> ) <sub>4</sub> <sup>-6</sup> +<br>Ca(HPO <sub>4</sub> ) <sub>2</sub> <sup>-2</sup> →<br>Ca <sub>2</sub> (HPO <sub>4</sub> ) <sub>6</sub> <sup>-8</sup> | 6.56   | 450 | Ca-Ca d<br>Ca <sub>1</sub> -O <sub>w</sub> CN<br>Ca <sub>2</sub> -O <sub>w</sub> CN | Ca-Ca d: 20.0<br>Ca <sub>1</sub> (P <sub>1</sub> ,P <sub>2</sub> ,P <sub>3</sub> ,P <sub>4</sub> ,P <sub>5</sub> ,P <sub>6</sub> ) CN:<br>3.9<br>Ca <sub>2</sub> (P <sub>1</sub> ,P <sub>2</sub> ,P <sub>3</sub> ,P <sub>4</sub> ,P <sub>5</sub> ,P <sub>6</sub> ) CN:<br>1.9<br>P <sub>1</sub> (Ca <sub>1</sub> ,Ca <sub>2</sub> ) CN: 0.9<br>P <sub>2</sub> (Ca <sub>1</sub> ,Ca <sub>2</sub> ) CN: 0.9<br>P <sub>3</sub> (Ca <sub>1</sub> ,Ca <sub>2</sub> ) CN: 0.9<br>P <sub>4</sub> (Ca <sub>1</sub> ,Ca <sub>2</sub> ) CN: 0.9<br>P <sub>5</sub> (Ca <sub>1</sub> ,Ca <sub>2</sub> ) CN: 0.9<br>P <sub>6</sub> (Ca <sub>1</sub> ,Ca <sub>2</sub> ) CN: 0.9                   |

**Table S2.** The standard free energies for formation of each ion cluster. Where multiple pathways are available, then the free energy for each association mechanism is given and the uncertainty is reported as the standard error.

|           | <b>Species</b>                                                 | <b>Association Mechanism</b> | $\Delta G_{\text{individual}}$<br><b>(kJ/mol)</b> | $\Delta G_{\text{average}}$<br><b>(kJ/mol)</b> | <b>Uncertainty<br/>(kJ/mol)</b> |
|-----------|----------------------------------------------------------------|------------------------------|---------------------------------------------------|------------------------------------------------|---------------------------------|
| <b>21</b> | CaHPO <sub>4</sub>                                             | <b>1</b>                     |                                                   | -17.86                                         |                                 |
| <b>22</b> | Ca(HPO <sub>4</sub> ) <sub>2</sub> <sup>-2</sup>               | <b>1+2</b>                   |                                                   | -29.87                                         |                                 |
| <b>23</b> | Ca(HPO <sub>4</sub> ) <sub>3</sub> <sup>-4</sup>               | <b>1+2+9</b>                 |                                                   | -28.74                                         |                                 |
| <b>24</b> | Ca(HPO <sub>4</sub> ) <sub>4</sub> <sup>-6</sup>               | <b>1+2+9+16</b>              |                                                   | -17.83                                         |                                 |
| <b>25</b> | Ca <sub>2</sub> (HPO <sub>4</sub> ) <sub>2</sub>               | <b>1+2+3</b>                 | -51.13                                            | -52.13                                         | 0.88                            |
|           |                                                                | <b>1+4+5</b>                 | -54.29                                            |                                                |                                 |
|           |                                                                | <b>2*1+6</b>                 | -50.97                                            |                                                |                                 |
| <b>26</b> | Ca <sub>2</sub> (HPO <sub>4</sub> ) <sub>3</sub> <sup>-2</sup> | <b>25+7</b>                  | -68.78                                            | -68.18                                         | 0.40                            |
|           |                                                                | <b>1+22+8</b>                | -67.21                                            |                                                |                                 |
|           |                                                                | <b>23+10</b>                 | -68.56                                            |                                                |                                 |
| <b>27</b> | Ca <sub>2</sub> (HPO <sub>4</sub> ) <sub>4</sub> <sup>-4</sup> | <b>2*22+11</b>               | -68.45                                            | -70.59                                         | 1.65                            |
|           |                                                                | <b>1+23+12</b>               | -74.49                                            |                                                |                                 |
|           |                                                                | <b>25+13</b>                 | -68.39                                            |                                                |                                 |
| <b>28</b> | Ca <sub>2</sub> (HPO <sub>4</sub> ) <sub>5</sub> <sup>-6</sup> | <b>26+14</b>                 | -60.87                                            | -56.98                                         | 3.33                            |
|           |                                                                | <b>22+23+15</b>              | -61.26                                            |                                                |                                 |
|           |                                                                | <b>24+17</b>                 | -48.82                                            |                                                |                                 |
| <b>29</b> | Ca <sub>2</sub> (HPO <sub>4</sub> ) <sub>6</sub> <sup>-8</sup> | <b>28+18</b>                 | -36.06                                            | -40.83                                         | 2.18                            |
|           |                                                                | <b>2*23+19</b>               | -45.29                                            |                                                |                                 |
|           |                                                                | <b>24+22+20</b>              | -41.14                                            |                                                |                                 |

**Table S3.** The free energies for formation of each ion cluster as reported by Yang et al.<sup>1</sup> in their published work and recalculated in this work via alignment to the asymptotic long-range limit as seen in Figure S21.

| <b>Association /<br/>Species</b>                                                                     | <b><math>\Delta A_{\text{reported}}</math><br/>(kJ/mol)</b> | <b><math>\Delta A_{\text{recalculated}}</math><br/>(kJ/mol)</b> |
|------------------------------------------------------------------------------------------------------|-------------------------------------------------------------|-----------------------------------------------------------------|
| $\text{Ca}^{2+} + \text{HPO}_4^{2-} \rightarrow$<br>$\text{CaHPO}_4$                                 | -27.2                                                       | -26.5                                                           |
| $\text{CaHPO}_4 + \text{HPO}_4^{2-} \rightarrow$<br>$\text{Ca}(\text{HPO}_4)_2$                      | -27.2                                                       | -15.0                                                           |
| $\text{Ca}(\text{HPO}_4)_2^{2-} + \text{HPO}_4^{2-}$<br>$\rightarrow \text{Ca}(\text{HPO}_4)_3^{-4}$ | -27.2                                                       | -15.6                                                           |
| $\text{CaHPO}_4$                                                                                     | -27.2                                                       | -26.5                                                           |
| $\text{Ca}(\text{HPO}_4)_2^{2-}$                                                                     | -54.4                                                       | -41.5                                                           |
| $\text{Ca}(\text{HPO}_4)_3^{-4}$                                                                     | -81.6                                                       | -57.0                                                           |

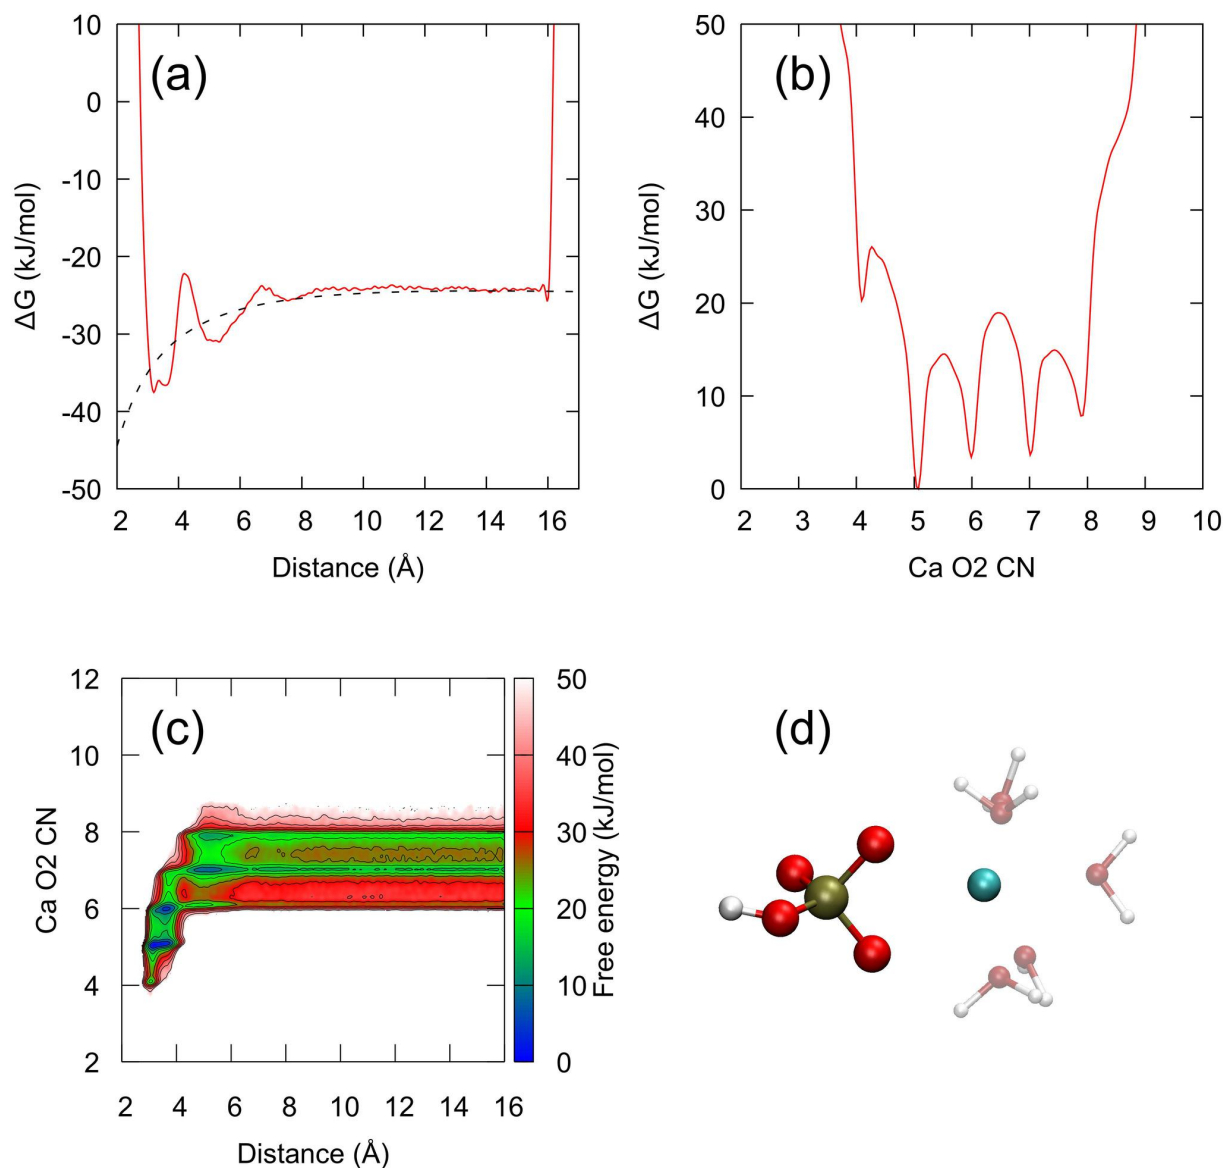

**Figure S1.** Reaction 1 ( $\text{Ca}^{2+} + \text{HPO}_4^{2-} \rightarrow \text{CaHPO}_4$ ) using the distance between  $\text{Ca}^{2+}$  and the P of  $\text{HPO}_4^{2-}$  and the Ca-O<sub>w</sub> coordination number as the biased CVs. We show (a) the free energy as a function of the distance between species, (b) free energy as a function of the calcium water oxygen CN, (c) free energy as a function of both the distance between species and calcium water oxygen CN, and (d) an example geometry at the minimum.

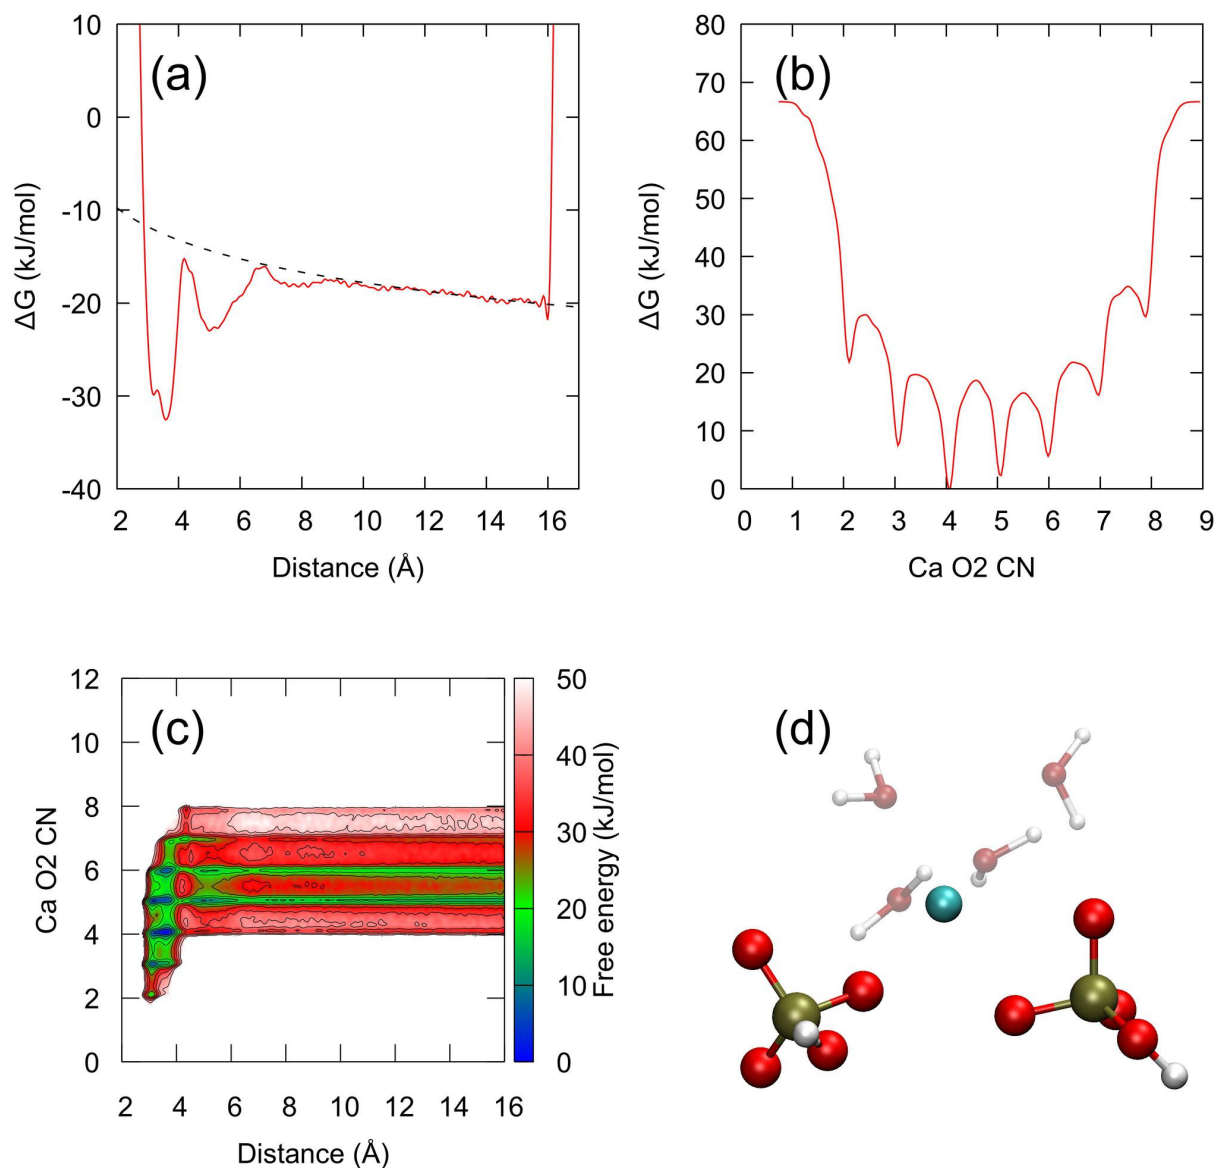

**Figure S2.** Reaction 2 ( $\text{CaHPO}_4 + \text{HPO}_4^{2-} \rightarrow \text{Ca}(\text{HPO}_4)_2^{2-}$ ) using the distance between  $\text{Ca}^{2+}$ , the Ca of  $\text{CaHPO}_4$  and the Ca-O<sub>w</sub> coordination number as the biased CVs. We show (a) the free energy as a function of the distance between species, (b) free energy as a function of the calcium water oxygen CN, (c) free energy as a function of both the distance between species and calcium water oxygen CN, and (d) an example geometry at the minimum.

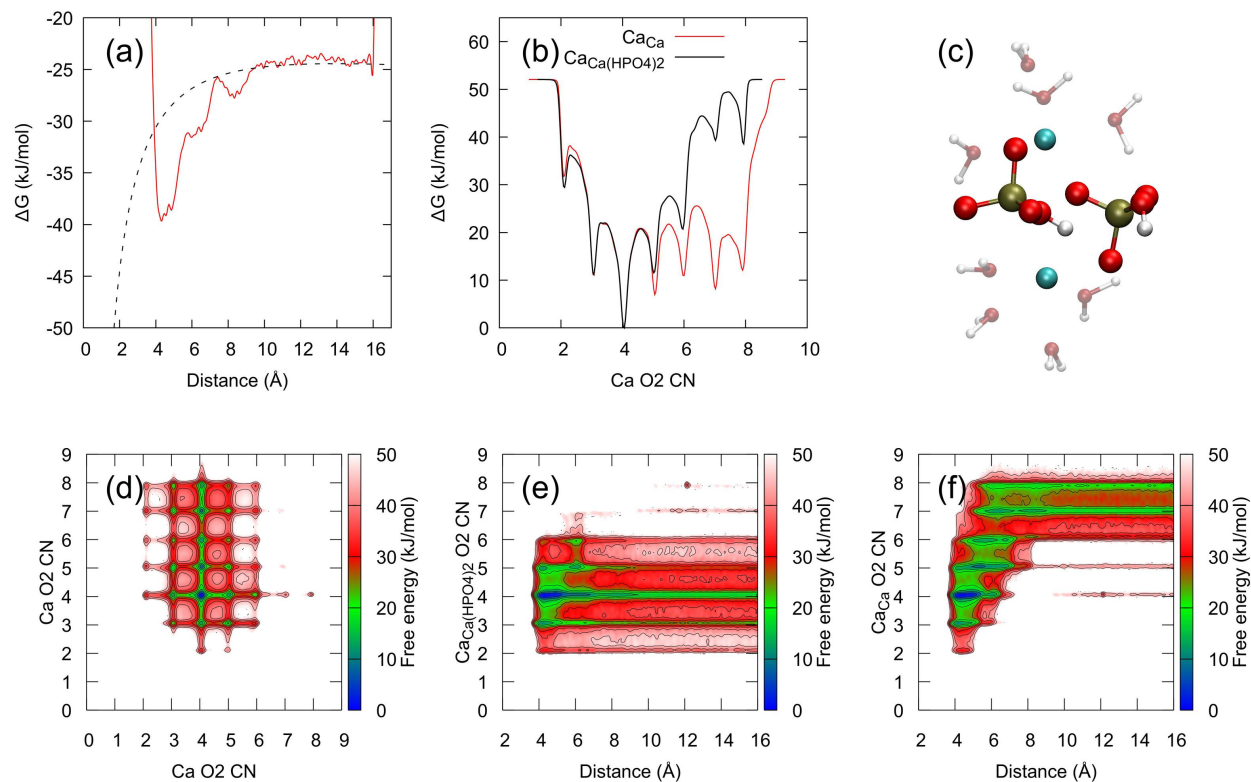

**Figure S3.** Reaction 3 ( $\text{Ca}(\text{HPO}_4)_2^{2-} + \text{Ca}^{2+} \rightarrow (\text{CaHPO}_4)_2$ ) using the distance between the Ca atoms and the two Ca- $\text{O}_w$  coordination numbers as the biased CVs. We show (a) the free energy as a function of the distance between species, (b) free energy as a function of the two distinct calcium water oxygen CNs, (c) an example geometry at the minimum, (d) free energy as a function of both calcium water oxygen CNs, and (e,f) free energy as a function of the distance between species and each one of the two calcium water oxygen CNs.



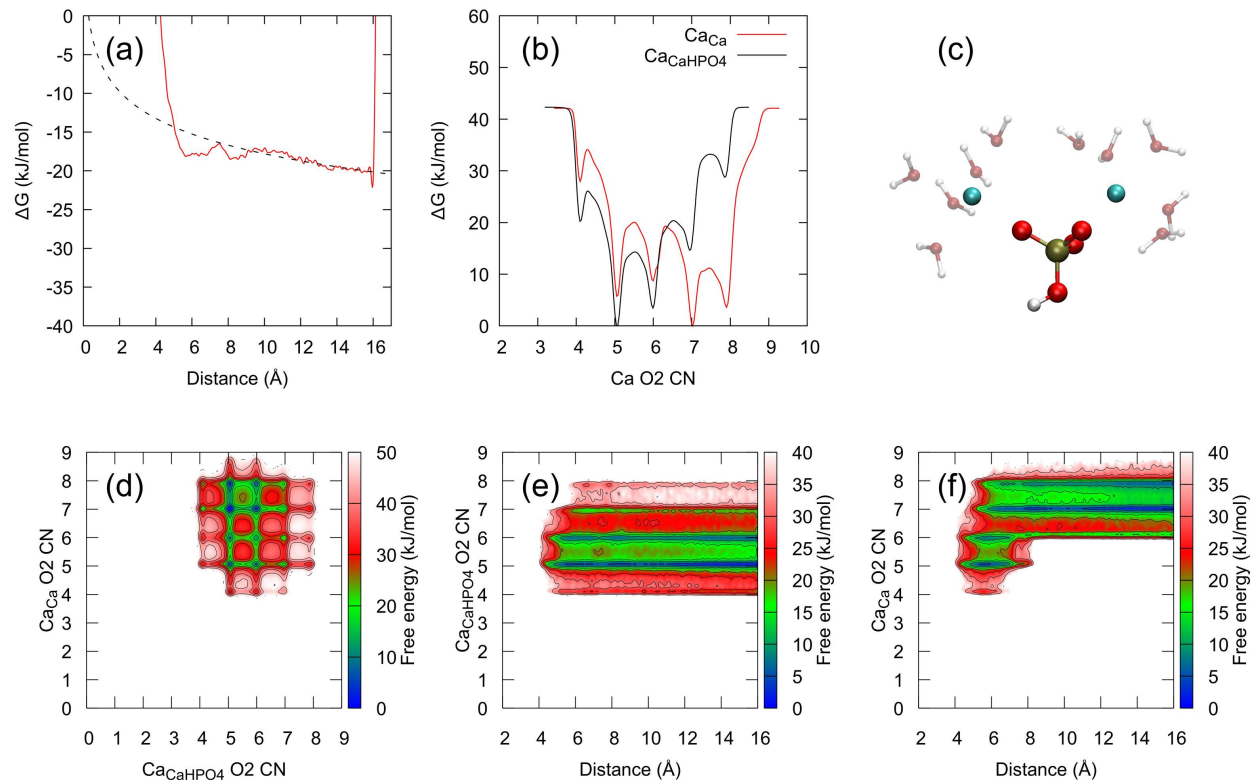

**Figure S4.** Reaction 4 ( $\text{CaHPO}_4 + \text{Ca}^{2+} \rightarrow \text{Ca}_2\text{HPO}_4^{2+}$ ) using the distance between  $\text{Ca}^{2+}$  and COM of  $\text{CaHPO}_4$  and the two  $\text{Ca-O}_W$  coordination numbers as the biased CVs. We show (a) the free energy as a function of the distance between species, (b) free energy as a function of the two distinct calcium water oxygen CNs, (c) an example geometry at the minimum, (d) free energy as a function of both calcium water oxygen CNs, and (e,f) free energy as a function of the distance between species and each one of the two calcium water oxygen CNs.

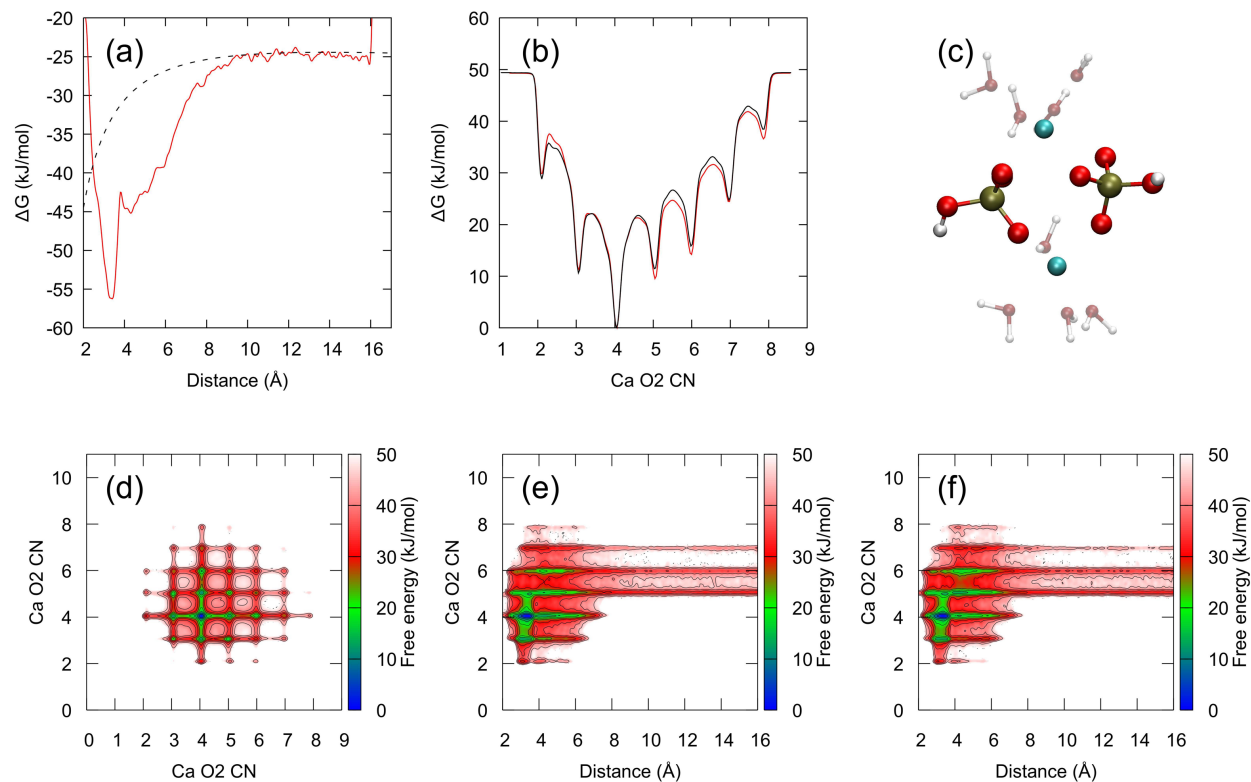

**Figure S5.** Reaction 5 ( $\text{Ca}_2\text{HPO}_4^{2+} + \text{HPO}_4^{2-} \rightarrow (\text{CaHPO}_4)_2$ ) using the distance between  $\text{Ca}^{2+}$  and COM of  $\text{Ca}_2\text{HPO}_4^{2+}$  and the two  $\text{Ca-O}_w$  coordination numbers as the biased CVs. We show (a) the free energy as a function of the distance between species, (b) free energy as a function of the two calcium water oxygen CNs, (c) an example geometry at the minimum, (d) free energy as a function of both calcium water oxygen CNs, and (e,f) free energy as a function of the distance between species and each one of the two calcium water oxygen CNs.

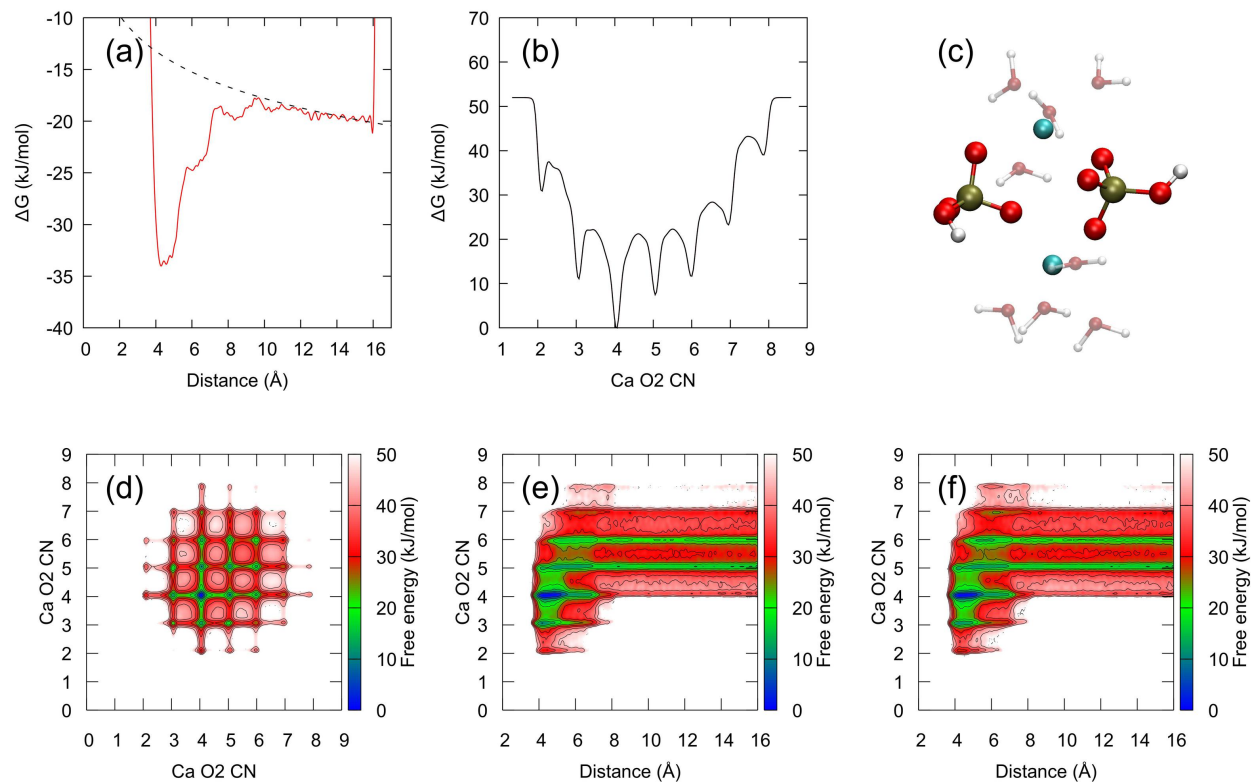

**Figure S6.** Reaction 6 ( $\text{CaHPO}_4 + \text{CaHPO}_4 \rightarrow (\text{CaHPO}_4)_2$ ) using the distance between  $\text{Ca}^{2+}$  atoms and the two  $\text{Ca-O}_w$  coordination numbers as the biased CVs. We show (a) the free energy as a function of the distance between species, (b) free energy as a function of the two nominally symmetry equivalent calcium water oxygen CNs, (c) an example geometry at the minimum, (d) free energy as a function of both calcium water oxygen CNs, and (e,f) free energy as a function of the distance between species and each one of the two calcium water oxygen CNs.

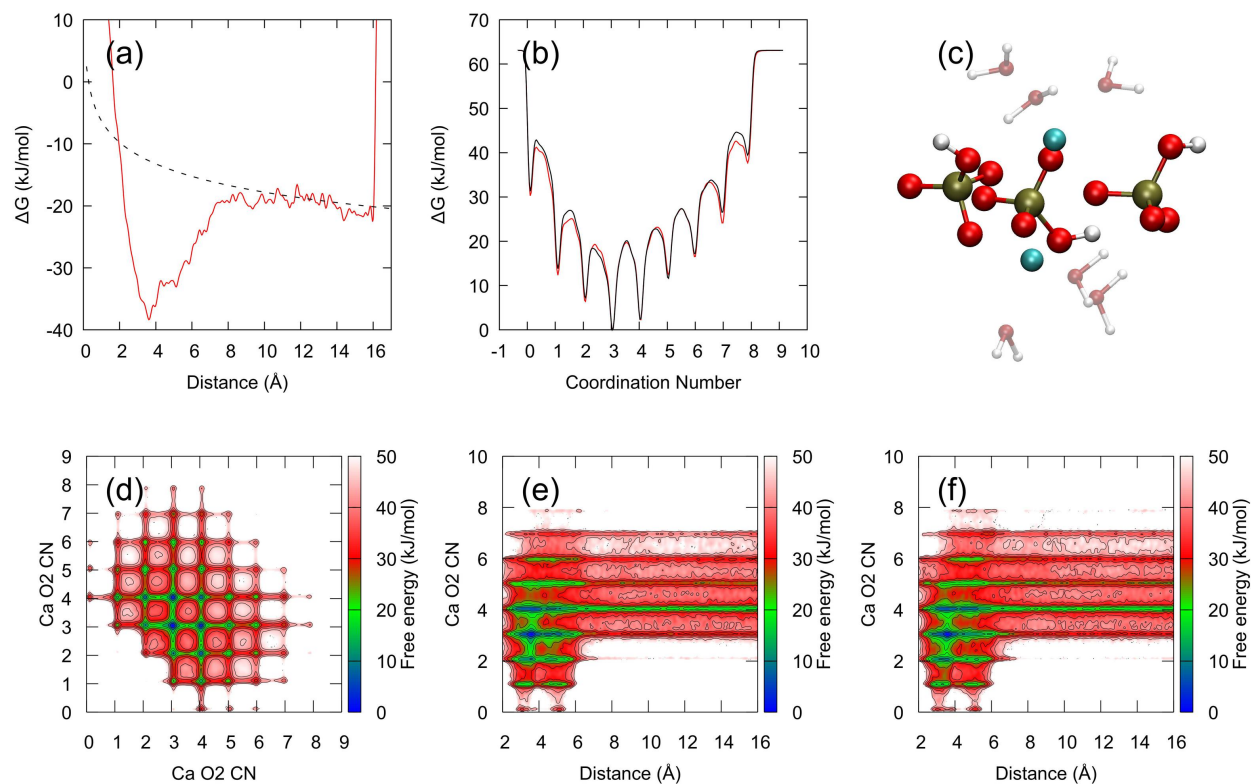

**Figure S7.** Reaction 7 ( $\text{HPO}_4^{-2} + (\text{CaHPO}_4)_2 \rightarrow \text{Ca}_2(\text{HPO}_4)_3^{-2}$ ) using the distance between the COM of  $\text{HPO}_4^{-2}$  and the COM of  $(\text{CaHPO}_4)_2$  and the two Ca-O<sub>w</sub> coordination numbers as the biased CVs. We show (a) the free energy as a function of the distance between species, (b) free energy as a function of the two nominally symmetry equivalent calcium water oxygen CNs, (c) an example geometry at the minimum, (d) free energy as a function of both calcium water oxygen CNs, and (e,f) free energy as a function of the distance between species and each one of the two calcium water oxygen CNs.

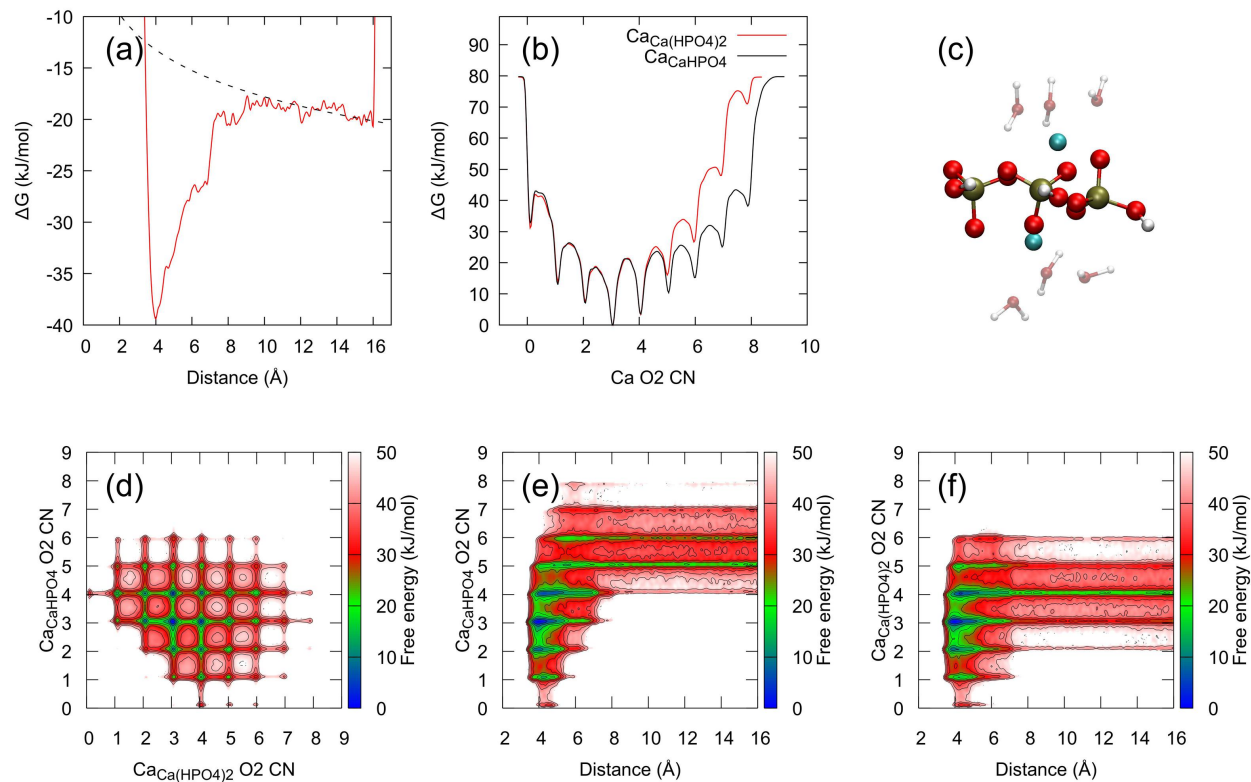

**Figure S8.** Reaction 8 ( $\text{CaHPO}_4 + \text{Ca}(\text{HPO}_4)_2^{2-} \rightarrow \text{Ca}_2(\text{HPO}_4)_3^{2-}$ ) using the distance between the Ca of  $\text{CaHPO}_4$  and the Ca of  $\text{Ca}(\text{HPO}_4)_2^{2-}$  and the two Ca-O<sub>w</sub> coordination numbers as the biased CVs. We show (a) the free energy as a function of the distance between species, (b) free energy as a function of the two distinct calcium water oxygen CNs, (c) an example geometry at the minimum, (d) free energy as a function of both calcium water oxygen CNs, and (e,f) free energy as a function of the distance between species and each one of the two calcium water oxygen CNs.

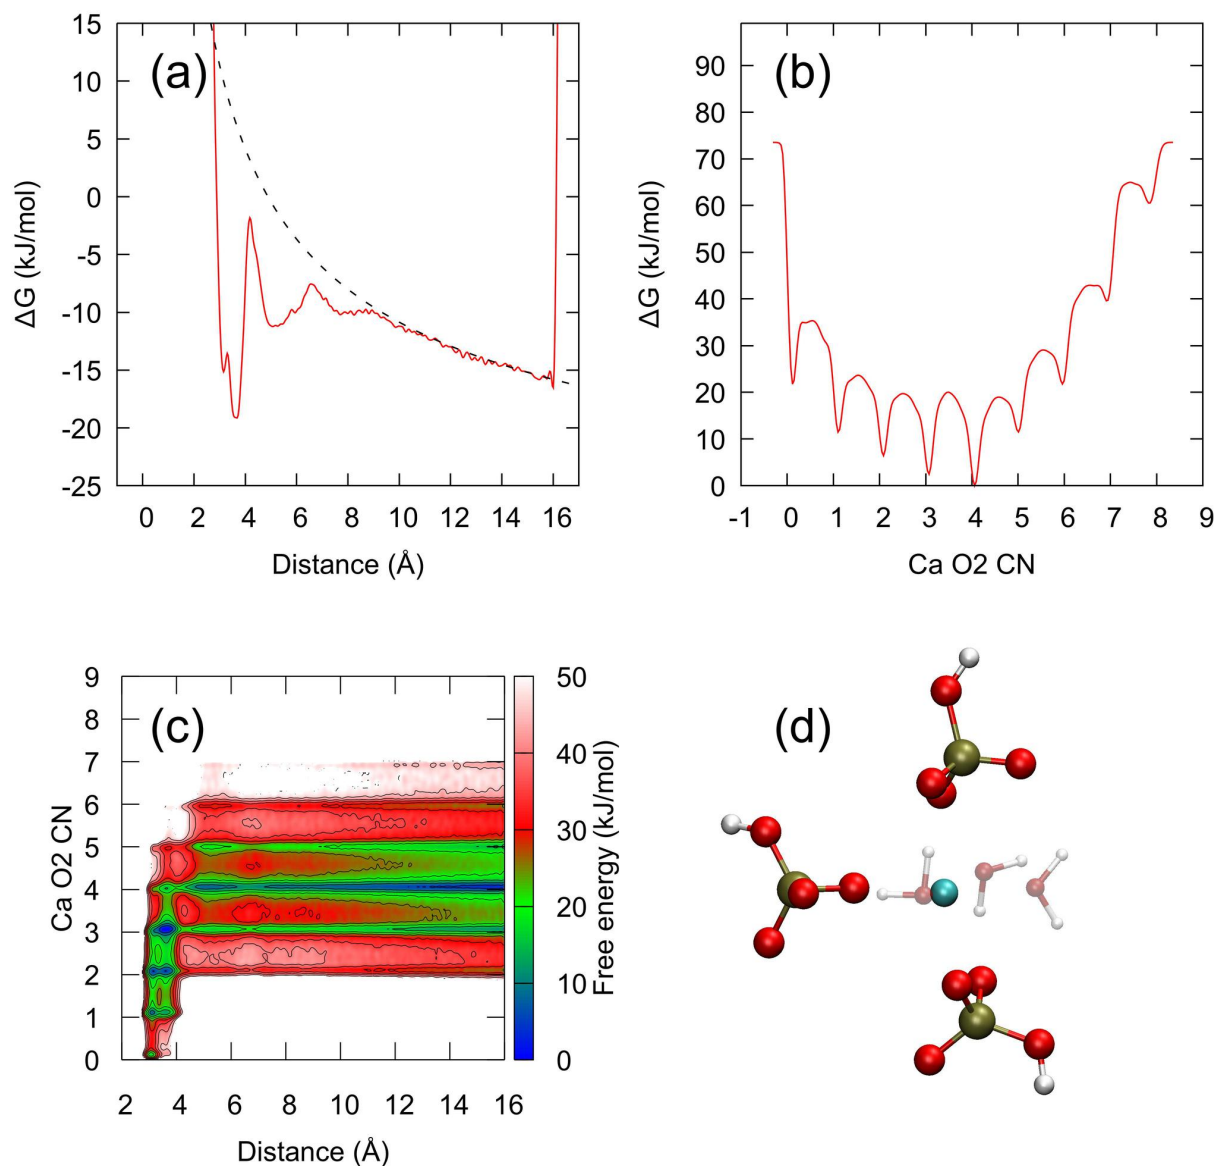

**Figure S9.** Reaction 9 ( $\text{Ca}(\text{HPO}_4)_2^{2-} + \text{HPO}_4^{2-} \rightarrow \text{Ca}(\text{HPO}_4)_3^{4-}$ ) using the distance between the COM of  $\text{Ca}(\text{HPO}_4)_2^{2-}$  and the P of  $\text{HPO}_4^{2-}$  and the Ca- $\text{O}_w$  coordination numbers as the biased CVs. We show (a) the free energy as a function of the distance between species, (b) free energy as a function of the calcium water oxygen CN, (c) free energy as a function of both the distance between species and calcium's water oxygen CN, and (d) an example geometry at the minimum.

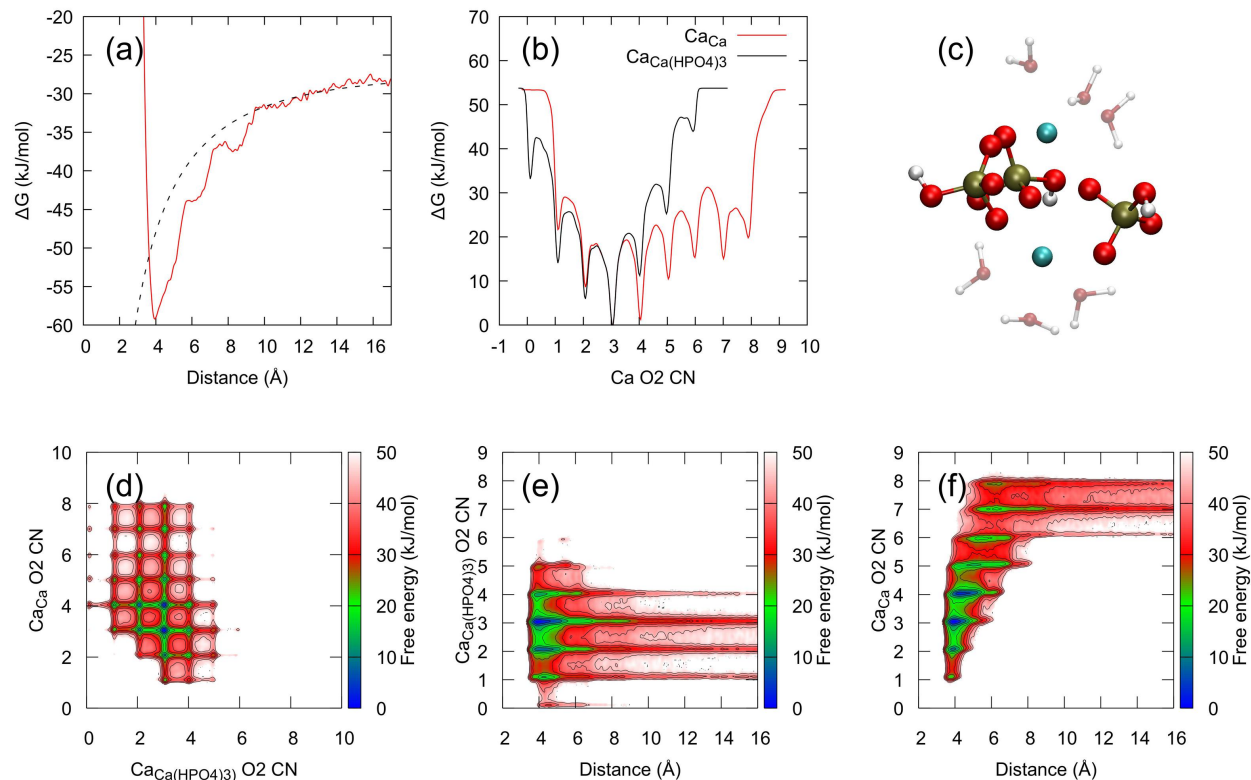

**Figure S10.** Reaction 10 ( $\text{Ca}(\text{HPO}_4)_3^{3-} + \text{Ca}^{2+} \rightarrow \text{Ca}_2(\text{HPO}_4)_3^{2-}$ ) using the distance between the Ca of  $\text{Ca}(\text{HPO}_4)_3^{3-}$  and the isolated  $\text{Ca}^{2+}$  and the two Ca-O<sub>w</sub> coordination numbers as the biased CVs. We show (a) the free energy as a function of the distance between species, (b) free energy as a function of the two distinct calcium water oxygen CNs, (c) an example geometry at the minimum, (d) free energy as a function of both calcium water oxygen CNs, and (e,f) free energy as a function of the distance between species and each of one of the two calcium water oxygen CNs.



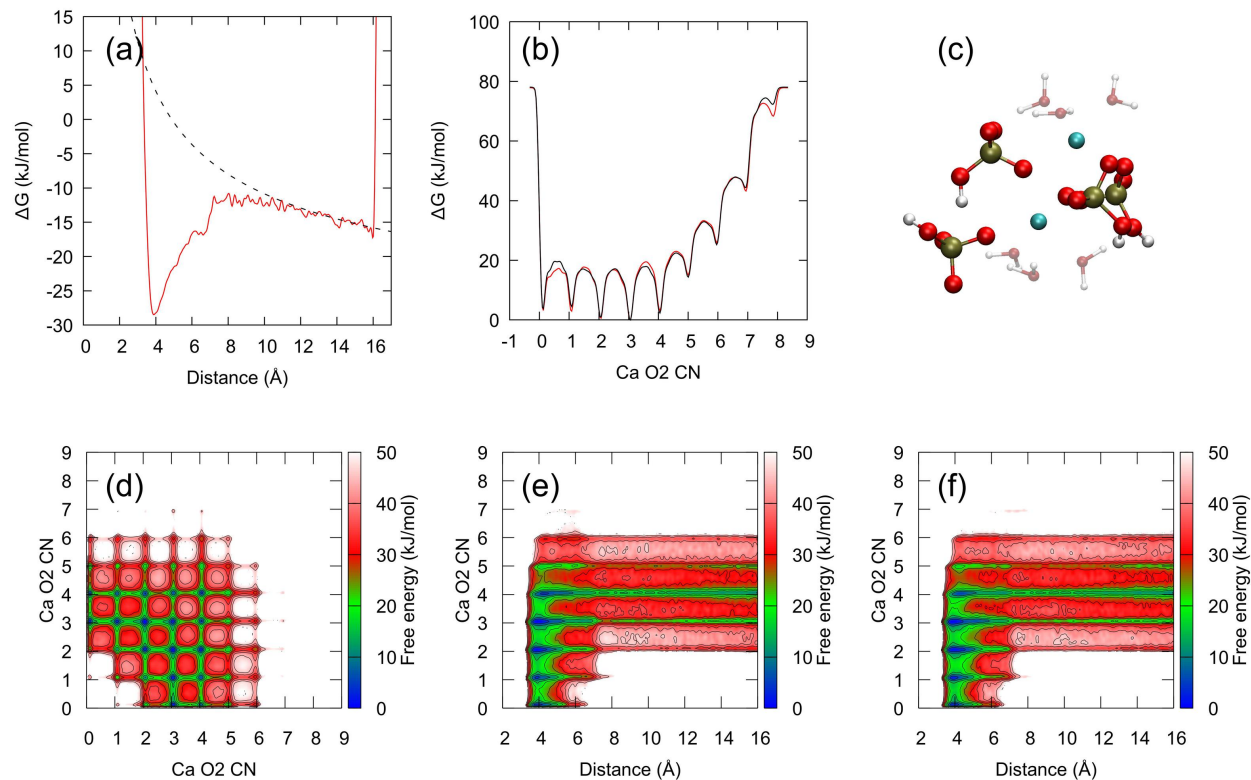

**Figure S11.** Reaction 11 ( $\text{Ca}(\text{HPO}_4)_2^{-2} + \text{Ca}(\text{HPO}_4)_2^{-2} \rightarrow \text{Ca}_2(\text{HPO}_4)_4^{-4}$ ) using the distance between the two Ca ions of  $\text{Ca}(\text{HPO}_4)_2^{-2}$  and the two Ca- $\text{O}_w$  coordination numbers as the biased CVs. We show (a) the free energy as a function of the distance between species, (b) free energy as a function of the two nominally symmetry equivalent calcium water oxygen CNs, (c) an example geometry at the minimum, (d) free energy as a function of both calcium water oxygen CNs, and (e,f) free energy as a function of the distance between species and each one of the two calcium water oxygen CNs.



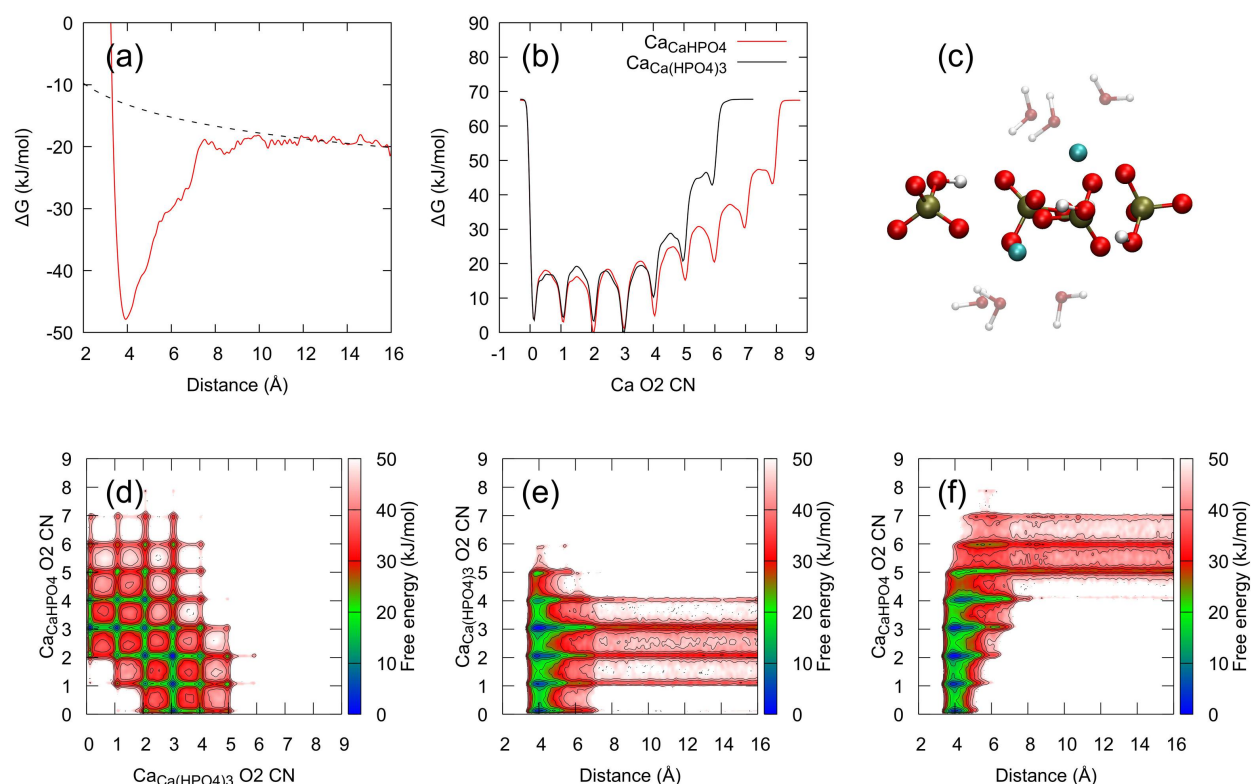

**Figure S12.** Reaction 12 ( $\text{Ca}(\text{HPO}_4)_3^{4-} + \text{CaHPO}_4 \rightarrow \text{Ca}_2(\text{HPO}_4)_4^{4-}$ ) using the distance between the  $\text{Ca}^{2+}$  of  $\text{Ca}(\text{HPO}_4)_3^{4-}$  and the  $\text{Ca}^{2+}$  of  $\text{CaHPO}_4$  and the two  $\text{Ca-O}_W$  coordination numbers as the biased CVs. We show (a) the free energy as a function of the distance between species, (b) free energy as a function of the two distinct calcium water oxygen CNs, (c) an example geometry at the minimum, (d) free energy as a function of both calcium water oxygen CNs, and (e,f) free energy as a function of the distance between species and each one of the two calcium water oxygen CNs.

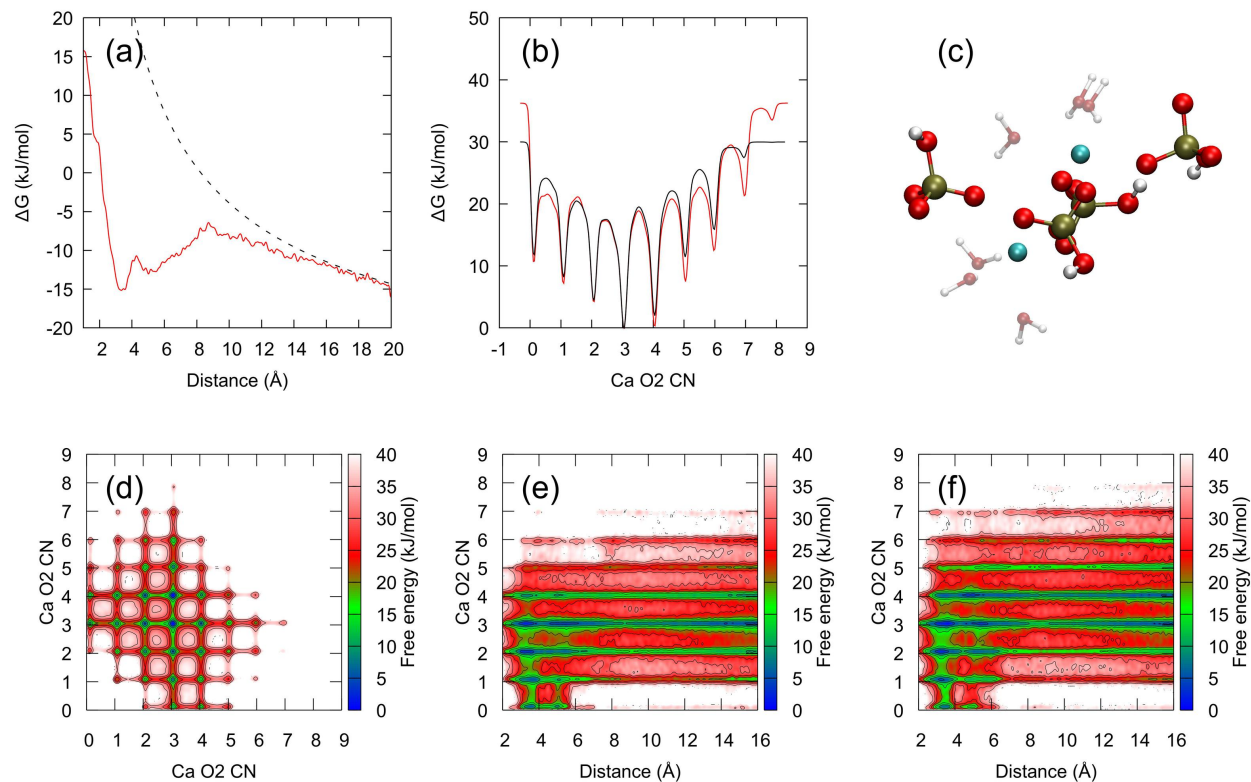

**Figure S13.** Reaction 13 ( $\text{Ca}_2(\text{HPO}_4)_3^{-2} + \text{HPO}_4^{-2} \rightarrow \text{Ca}_2(\text{HPO}_4)_4^{-4}$ ) using the distance between the COM of  $\text{Ca}_2(\text{HPO}_4)_3^{-2}$  and the COM of  $\text{HPO}_4^{-2}$  and the two Ca- $\text{O}_w$  coordination numbers as the biased CVs. We show (a) the free energy as a function of the distance between species, (b) free energy as a function of the two calcium water oxygen CNs, (c) an example geometry at the minimum, (d) free energy as a function of both calcium water oxygen CNs, and (e,f) free energy as a function of the distance between species and each one of the two calcium water oxygen CNs.

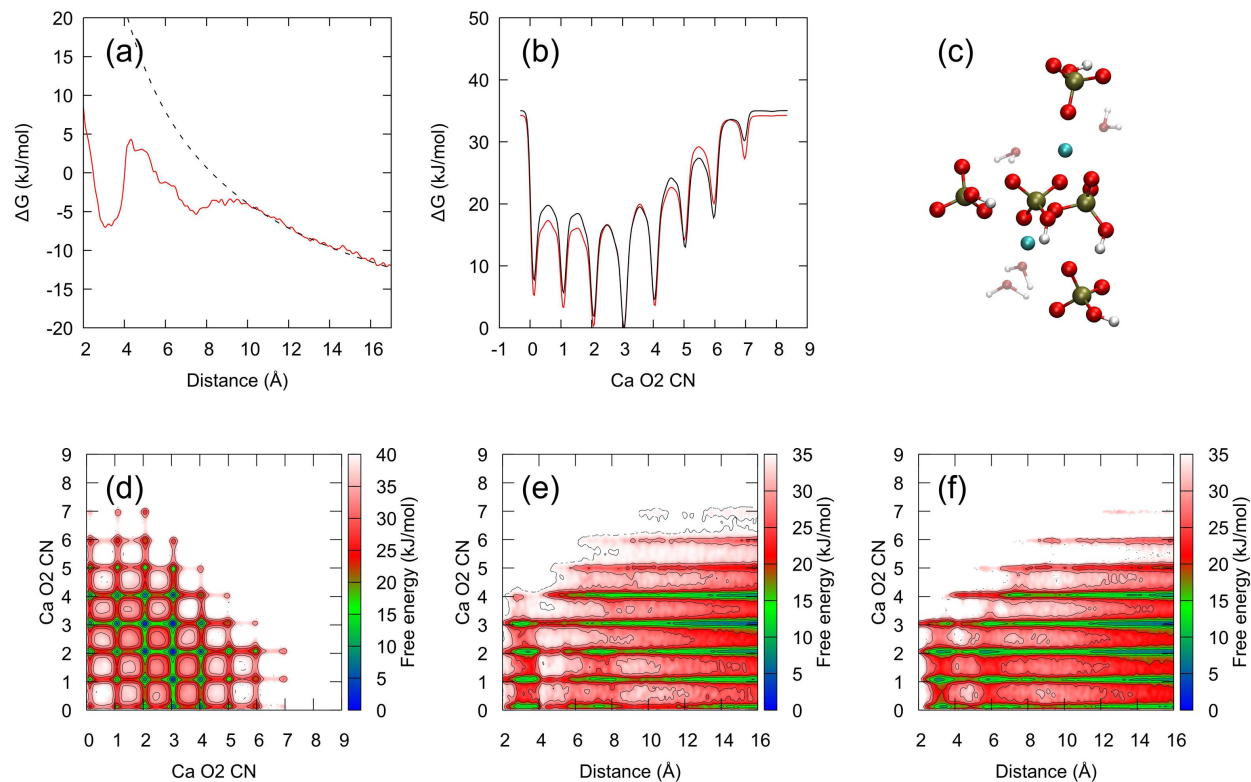

**Figure S14.** Reaction 14 ( $\text{Ca}_2(\text{HPO}_4)_4^{4-} + \text{HPO}_4^{2-} \rightarrow \text{Ca}_2(\text{HPO}_4)_5^{6-}$ ) using the distance between the COM of  $\text{Ca}_2(\text{HPO}_4)_4^{4-}$  and the COM of  $\text{HPO}_4^{2-}$  and the two Ca-O<sub>w</sub> coordination numbers as the biased CVs. We show (a) the free energy as a function of the distance between species, (b) free energy as a function of the two calcium water oxygen CNs, (c) an example geometry at the minimum, (d) free energy as a function of both calcium water oxygen CNs, and (e,f) free energy as a function of the distance between species and each one of the two calcium water oxygen CNs.

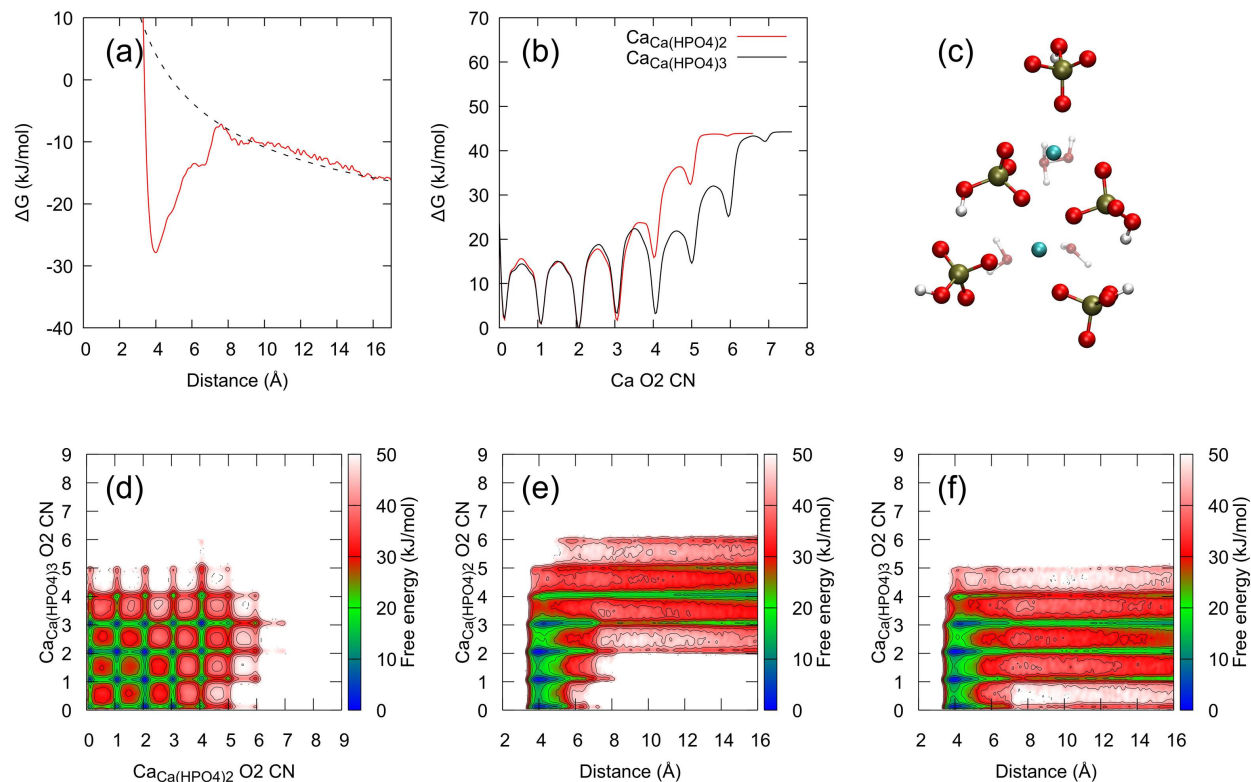

**Figure S15.** Reaction 15 ( $\text{Ca}(\text{HPO}_4)_3^{3-} + \text{Ca}(\text{HPO}_4)_2^{2-} \rightarrow \text{Ca}_2(\text{HPO}_4)_5^{6-}$ ) using the distance between the  $\text{Ca}^{2+}$  of  $\text{Ca}(\text{HPO}_4)_3^{3-}$  and the  $\text{Ca}^{2+}$  of  $\text{Ca}(\text{HPO}_4)_2^{2-}$  and the two  $\text{Ca}-\text{O}_w$  coordination numbers as the biased CVs. We show (a) the free energy as a function of the distance between species, (b) free energy as a function of each of the two distinct calcium water oxygen CNs, (c) an example geometry at the minimum, (d) free energy as a function of both calcium water oxygen CNs, and (e,f) free energy as a function of the distance between species and each one of the two calcium water oxygen CNs.

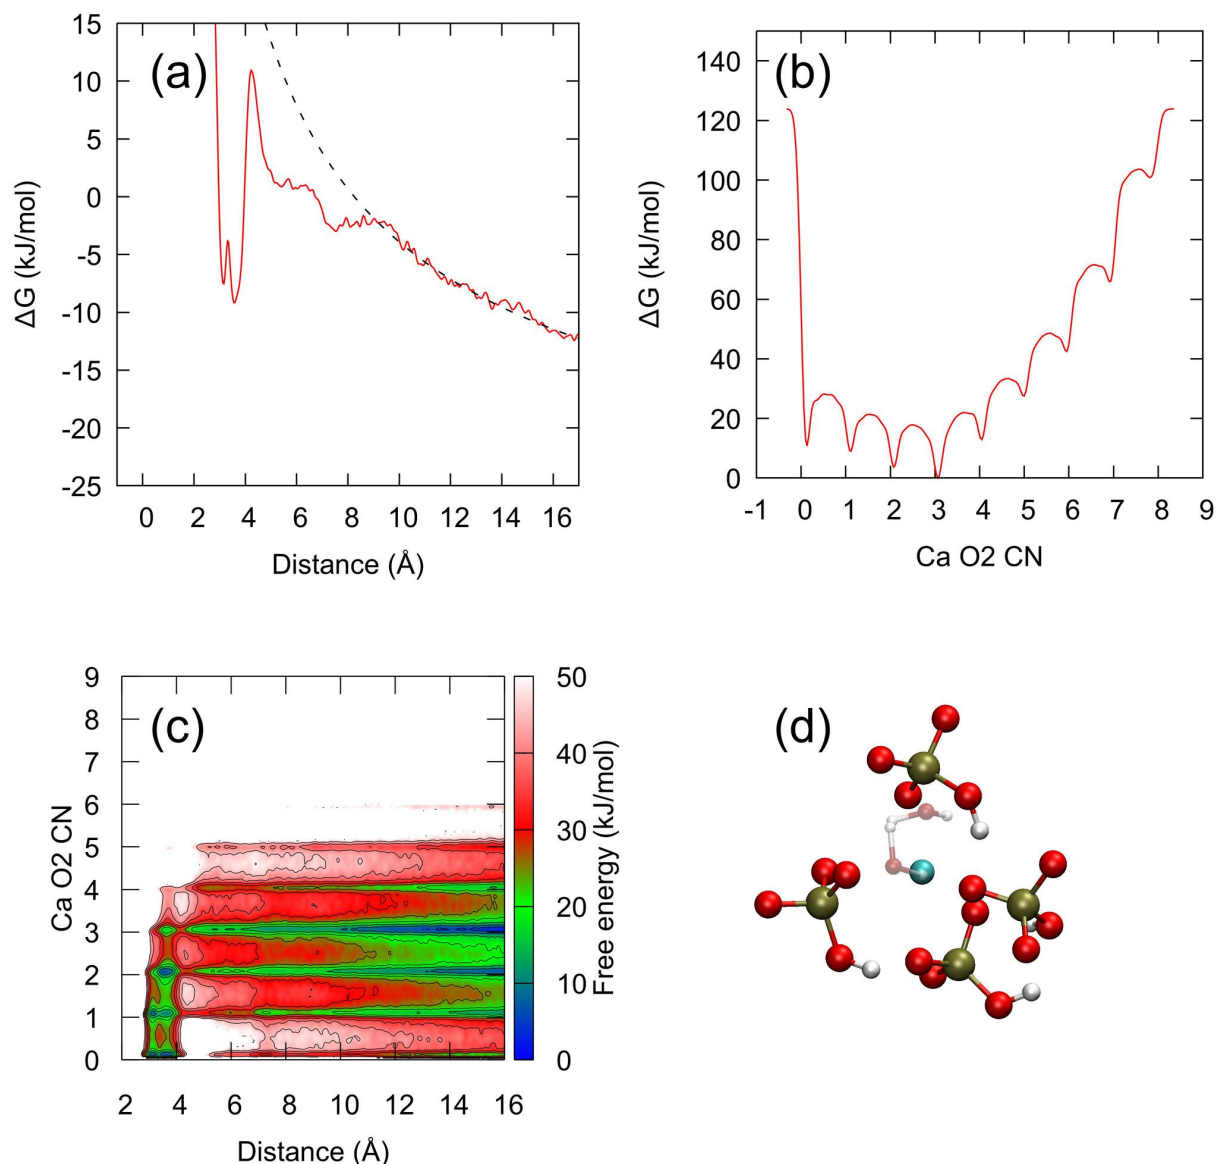

**Figure S16.** Reaction 16 ( $\text{Ca}(\text{HPO}_4)_3^{-4} + \text{HPO}_4^{-2} \rightarrow \text{Ca}(\text{HPO}_4)_4^{-6}$ ) using the distance between the COM of  $\text{Ca}(\text{HPO}_4)_3^{-4}$  and the COM of  $\text{HPO}_4^{-2}$  and the two Ca- $\text{O}_w$  coordination numbers as the biased CVs. We show (a) the free energy as a function of the distance between species, (b) free energy as a function of the calcium water oxygen CN, (c) free energy as a function of both the distance between species and the calcium water oxygen CN, and (d) an example geometry at the minimum.

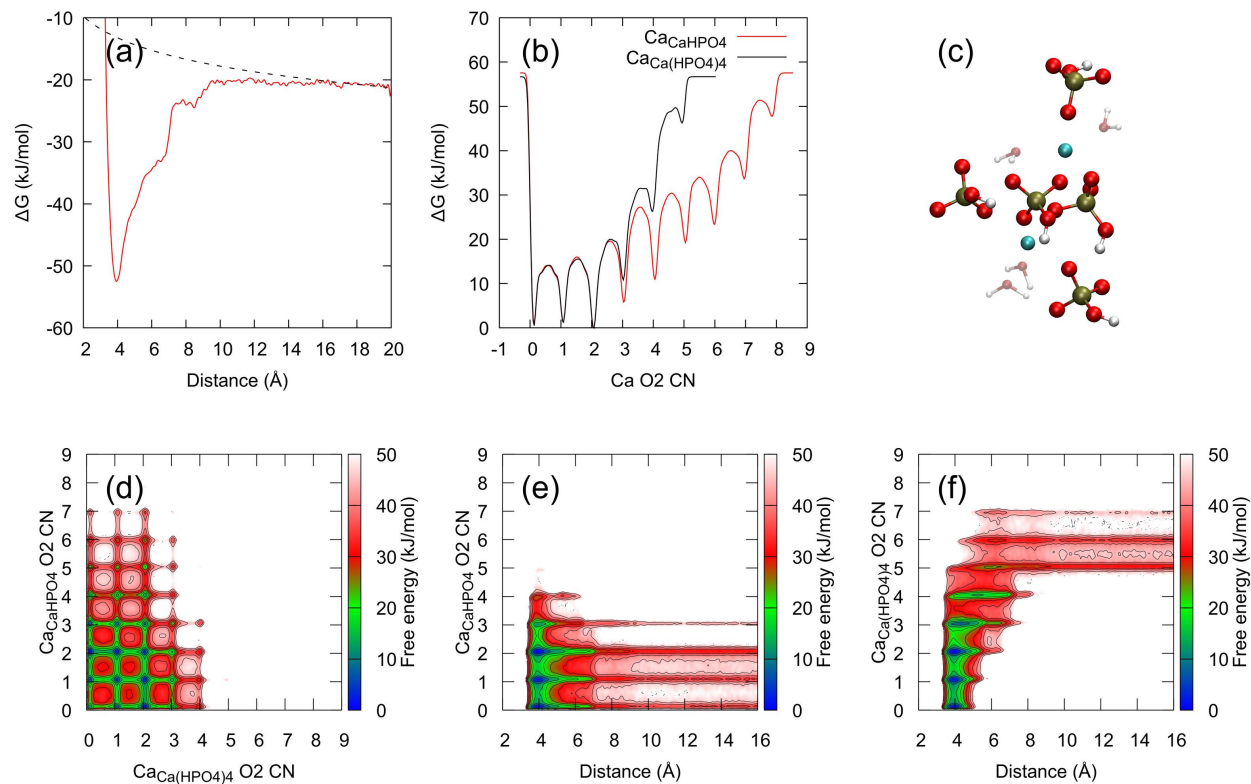

**Figure S17.** Reaction 17 ( $\text{Ca}(\text{HPO}_4)_4^{4-6} + \text{CaHPO}_4 \rightarrow \text{Ca}_2(\text{HPO}_4)_5^{5-6}$ ) using the distance between the  $\text{Ca}^{2+}$  of  $\text{Ca}(\text{HPO}_4)_4^{4-6}$  and the  $\text{Ca}^{2+}$  of  $\text{CaHPO}_4$  and the two  $\text{Ca-O}_W$  coordination numbers as the biased CVs. We show (a) the free energy as a function of the distance between species, (b) free energy as a function of each of the two distinct calcium water oxygen CNs, (c) an example geometry at the minimum, (d) free energy as a function of both calcium water oxygen CNs, and (e,f) free energy as a function of the distance between species and each one of the two calcium water oxygen CNs.



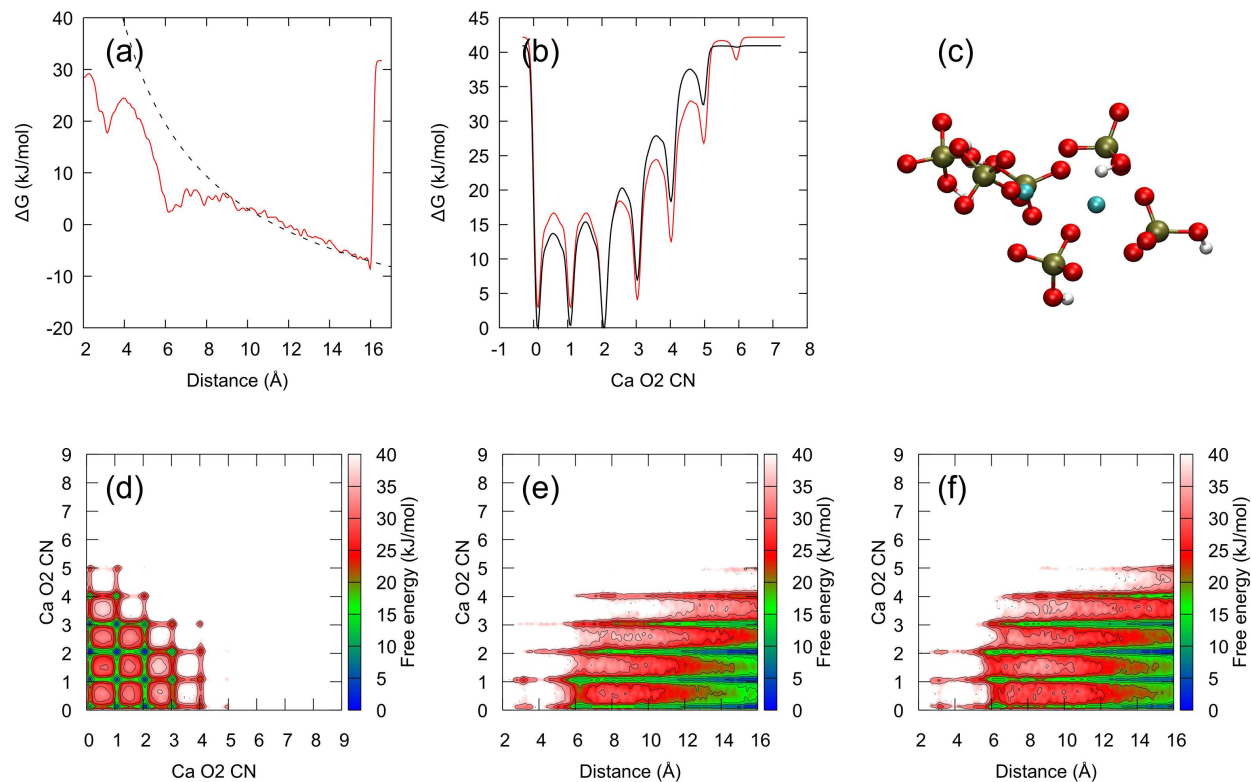

**Figure S18.** Reaction 18 ( $\text{Ca}_2(\text{HPO}_4)_5^{-6} + \text{HPO}_4^{-2} \rightarrow \text{Ca}_2(\text{HPO}_4)_6^{-8}$ ) using the distance between the COM of  $\text{Ca}_2(\text{HPO}_4)_5^{-6}$  and the COM of  $\text{HPO}_4^{-2}$  and the two Ca-O<sub>w</sub> coordination numbers as the biased CVs. We show (a) the free energy as a function of the distance between species, (b) free energy as a function of one of the two calcium water oxygen CNs, (c) an example geometry at the minimum, (d) free energy as a function of both calcium water oxygen CNs, and (e,f) free energy as a function of the distance between species and each of the calcium water oxygen CNs.

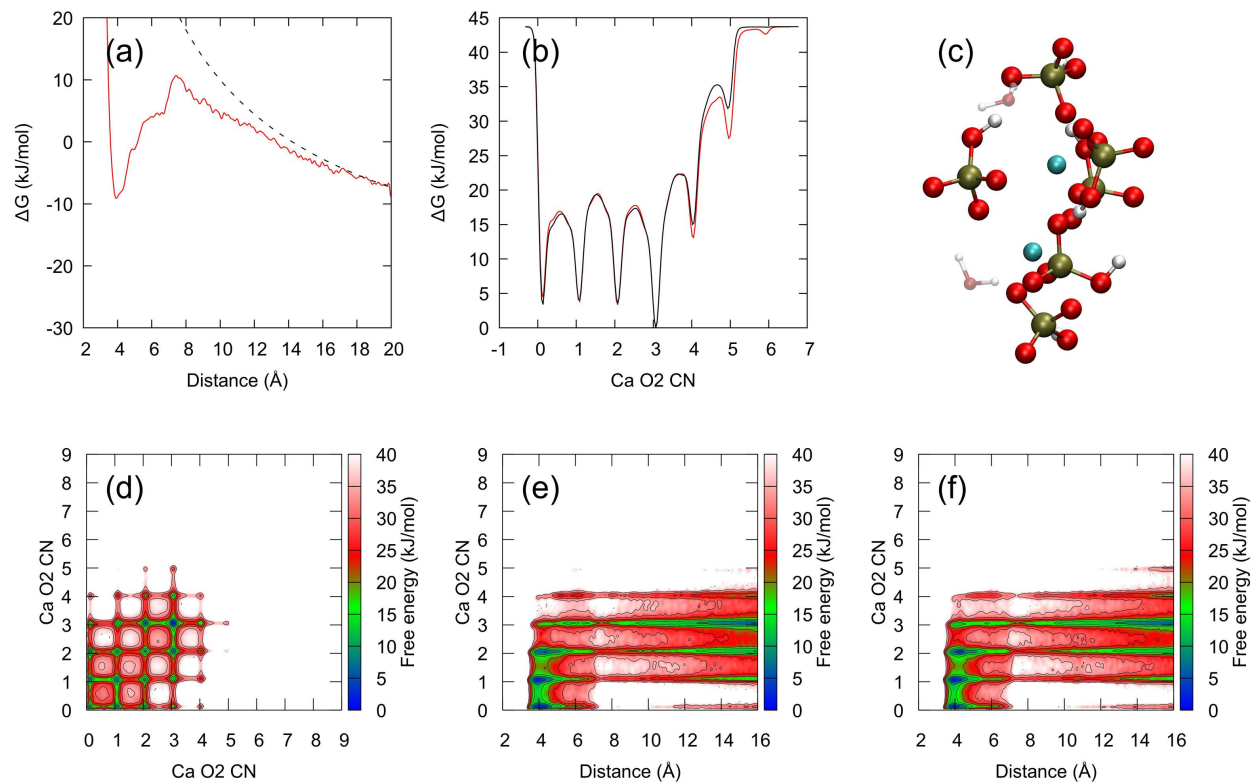

**Figure S19.** Reaction 19 ( $\text{Ca}(\text{HPO}_4)_3^{-4} + \text{Ca}(\text{HPO}_4)_3^{-4} \rightarrow \text{Ca}_2(\text{HPO}_4)_6^{-8}$ ) using the distance between the  $\text{Ca}^{2+}$  of  $\text{Ca}(\text{HPO}_4)_3^{-4}$  and the  $\text{Ca}^{2+}$  of  $\text{Ca}(\text{HPO}_4)_3^{-4}$  and the two Ca-O<sub>w</sub> coordination numbers as the biased CVs. We show (a) the free energy as a function of the distance between species, (b) free energy as a function of either of the two calcium water oxygen CNs, (c) an example geometry at the minimum, (d) free energy as a function of both calcium water oxygen CNs, and (e,f) free energy as a function of the distance between species and each one of the two calcium water oxygen CNs.



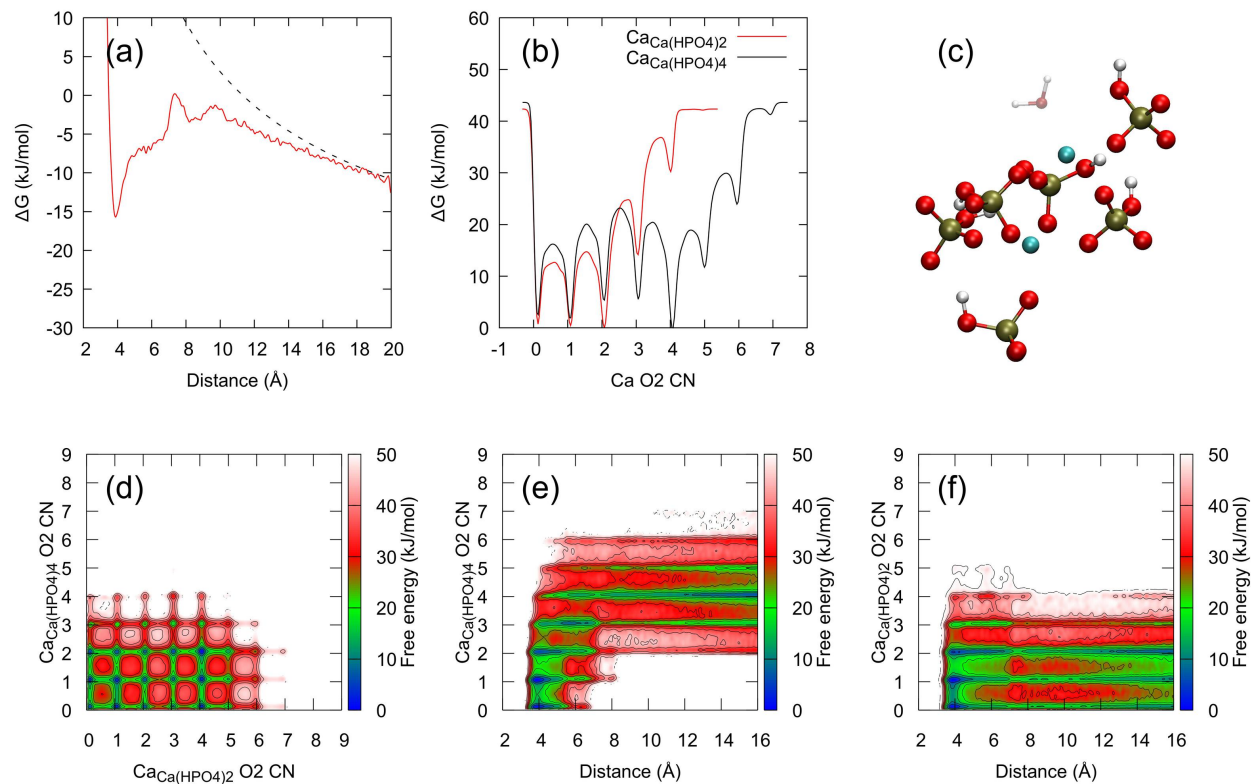

**Figure S20.** Reaction  $[\text{Ca}(\text{HPO}_4)_4]^{4-6} + \text{Ca}(\text{HPO}_4)_2^{2-} \rightarrow \text{Ca}_2(\text{HPO}_4)_6^{8-}$  using the distance between the  $\text{Ca}^{2+}$  of  $[\text{Ca}(\text{HPO}_4)_4]^{4-6}$  and the  $\text{Ca}^{2+}$  of  $\text{Ca}(\text{HPO}_4)_2^{2-}$  and the two  $\text{Ca}-\text{O}_w$  coordination numbers as the biased CVs. We show (a) the free energy as a function of distance between species, (b) free energy as a function of one of the two distinct calcium water oxygen CNs, (c) an example geometry at the minimum, (d) free energy as a function of both calcium water oxygen CNs, and (e,f) free energy as a function of the distance between species and each one of the two calcium water oxygen CNs.

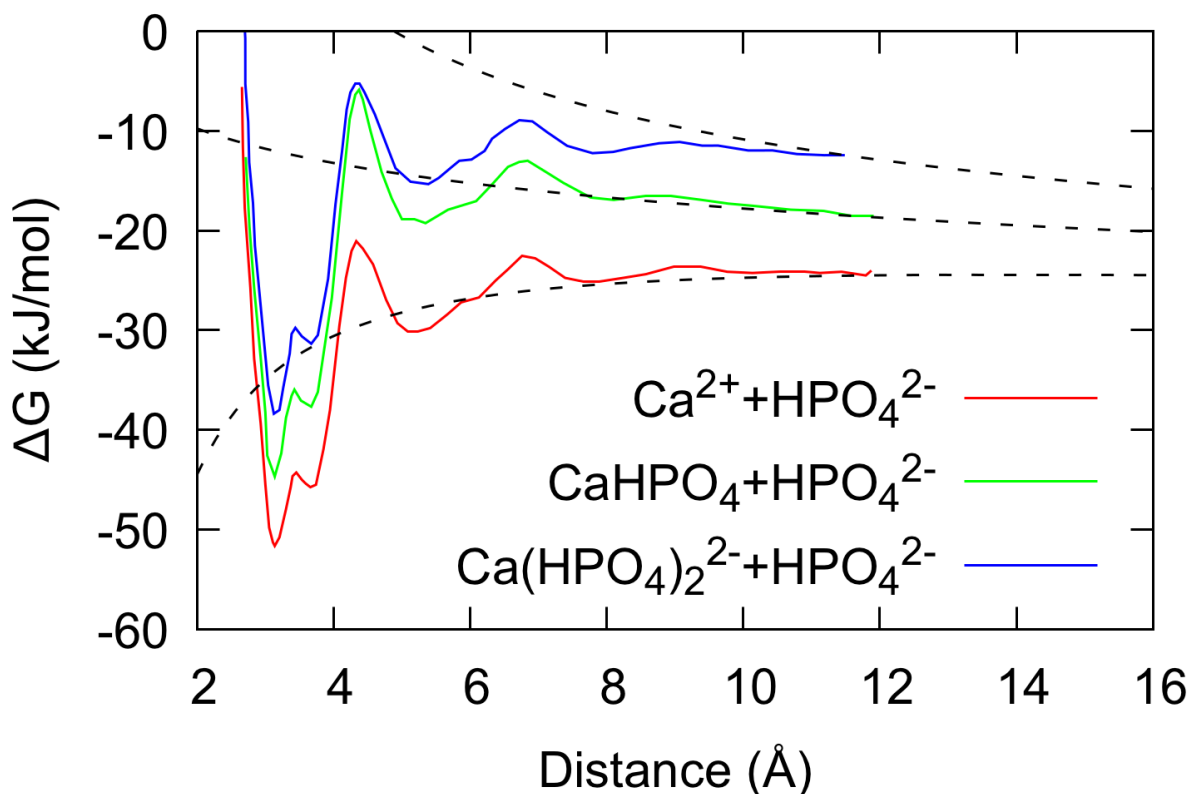

**Figure S21.** Figure 1 from the main manuscript, but here recreated using the free energy curves reported by Yang et al.<sup>1</sup> plotted as a function of the distance between  $\text{Ca}^{2+}$  and P within a  $(\text{HPO}_4)^{2-}$  group. The red, green and blue lines are the free energy profiles for  $\text{Ca}^{2+} + \text{HPO}_4^{2-} \rightarrow [\text{CaHPO}_4]^0$ ,  $[\text{CaHPO}_4]^0 + \text{HPO}_4^{2-} \rightarrow [\text{Ca}(\text{HPO}_4)_2]^{2-}$ ,  $[\text{Ca}(\text{HPO}_4)_2]^{2-} + \text{HPO}_4^{2-} \rightarrow [\text{Ca}(\text{HPO}_4)_3]^{4-}$ , respectively. The corresponding dashed lines represent the analytic solution in the long-range limit, which is used to align the absolute free energy. It should be noted that there is significant uncertainty in the alignment of the last of these curves (blue) since the data is only provided out to a shorter distance than would normally be used and the slope has yet to converge to the asymptote.

## Supplementary Discussion

### On the alignment of free energy profiles

As discussed in the Methods section of the main manuscript, the free energy profiles calculated using metadynamics in this work are aligned to an asymptotic limit described by the isolated ions in solution. The pairing free energy for two point particles interacting via a screened electrostatic potential is known analytically:

$$\Delta G(r) = \frac{1}{4\pi\epsilon_0} \frac{q^2}{\epsilon_r r} - RT \ln 4\pi r^2$$

where  $q$  is the charge,  $\epsilon_0$  is the vacuum permittivity,  $\epsilon_r$  is the relative permittivity and  $r$  is the distance between particles. This can be used to align the free energies obtained from the metadynamics (or umbrella sampling) calculations, whose long-range limit depends on the parameters of the simulations, such as the bias factor or the number of Gaussians that have been deposited. Besides being a useful method of determining convergence of the calculations at the long-range limit, this alignment is necessary to properly normalize the free energies relative to standard state conditions.

The study of Yang et al.<sup>1</sup> does not employ alignment to the asymptotic limit of the free ions in solution in their umbrella sampling free energy profiles. Therefore, the values originally quoted are not at standard conditions and cannot be directly compared to those given in the present manuscript. In order to facilitate a comparison we have attempted to align the data of Yang et al, as shown in Figure S21, resulting in the values quoted in Table S3.

### References

1. Yang, X.; Wang, M.; Yang, Y.; Cui, B.; Xu, Z.; Yanga, X., Physical origin underlying the prenucleation cluster-mediated nonclassical nucleation pathways for calcium phosphate. *Phys. Chem. Chem. Phys.* **2019** (Advance article) DOI: 101039/C9CP00919A
2. Kumar, S.; Rosenberg, J.; Bouzida, D.; Swendsen, R.H.; Kollman, P.A. The weighted histogram analysis method for free-energy calculations on biomolecules. I. The method. *J. Comput. Chem.* **1992**, 13 (8), 1011-1021.
